## **Thalamic encoding of lexical status is lateralized during reading aloud**

Dengyu Wang<sup>1,2</sup>, Witold J. Lipski<sup>1\*</sup>, Alan Bush<sup>3,7</sup>, Anna Chrabaszczyk<sup>4</sup>, Christina Dastolfo-Hromack<sup>5</sup>, Michael W. Dickey<sup>5</sup>, Julie A. Fiez<sup>4,6</sup> & R. Mark Richardson<sup>3,7,8\*</sup>

1. Department of Neurological Surgery, University of Pittsburgh School of Medicine, Pittsburgh, PA, 15213, USA
2. School of Medicine, Tsinghua University, Beijing, 100084, China
3. Brain Modulation Lab, Massachusetts General Hospital, Boston, MA, 02114, USA
4. Department of Psychology, University of Pittsburgh, Pittsburgh, PA, 15213, USA
5. Department of Communication Science and Disorders, University of Pittsburgh, Pittsburgh, PA, 15213, USA
6. University of Pittsburgh Brain Institute, Pittsburgh, PA, 15213, USA
7. Harvard Medical School, Boston, MA, 02115, USA

\*For correspondence:

[lipskiw@upmc.edu](mailto:lipskiw@upmc.edu)

[mark.richardson@mgh.harvard.edu](mailto:mark.richardson@mgh.harvard.edu)

## **Abstract**

To explore whether the thalamus participates in lexical status encoding, local field potentials were recorded in patients undergoing deep brain stimulation lead implantation while they read aloud single-syllable words and nonwords. Bilateral decreases in thalamic beta (12-30Hz) activity were preferentially locked to stimulus presentation, and these decreases were greater when nonwords were read. Increased broadband gamma (70-150Hz) activity also was locked preferentially to speech onset bilaterally, but greater nonword-related increases in this activity were observed only on the left, demonstrating lateralization of thalamic gamma selectivity for lexical status. In addition, this lexical status effect was strongest in more anterior thalamic locations, regions which are more likely to receive pallidal than cerebellar afferents. These results provide evidence from intracranial thalamic recordings for the lateralization and topography of subcortical lexical status processing.

## 1 **Introduction**

2 Reading words aloud depends on our ability to transform information about letter combinations  
3 into plans for producing speech sounds. Determining whether a group of letters represents a  
4 word is one important component of this process. While word reading can be supported by  
5 processes that permit mapping entire word forms to lexical representations, nonword reading  
6 depends upon sublexical processes that map spelling and sound (Coltheart et al., 2001).  
7 Functional neuroimaging has allowed for increasingly detailed study of the cortical regions that  
8 participate in these phonological processes, for instance demonstrating that a region of the  
9 inferior frontal gyrus (Brodmann's areas 44 and 45) is significantly more active for nonword  
10 reading than for word reading (Fiez et al., 1999; Hagoort et al., 1999; Heim et al., 2005;  
11 Herbster et al., 1997). The role of subcortical regions in spoken word production remains  
12 elusive, however, due to the low resolution of neuroimaging techniques for measuring  
13 subcortical activity. Resolving this knowledge gap is important, given that cortical activity is  
14 modulated by thalamic outflow through basal ganglia-thalamo-cortical and cerebello-thalamo-  
15 cortical circuits (Behrens et al., 2003; Bosch-Bouju et al., 2013; Hwang et al., 2017; Zhang et  
16 al., 2010). Despite the cortico-centric focus of most experimental work and accompanying  
17 models, there is increasing recognition of the role of subcortical processes in language  
18 production (Llano, 2015).

19  
20 Neurosurgical procedures involving invasive recording and stimulation in epilepsy patients  
21 undergoing electrode implantation for seizure mapping traditionally have provided the only direct  
22 means to test hypotheses related to cortical function during reading (Juphard et al., 2011).  
23 Epilepsy surgery, however, rarely provides access to the thalamus and basal ganglia.  
24 Movement disorders surgery, on the other hand, routinely provides direct access to the  
25 thalamus and basal ganglia in awake patients. Regionalization of language function within the  
26 left thalamus was established in surgery for movement disorders in the 1970s, in seminal  
27 studies by Ojemann and colleagues that employed electrical stimulation principles borrowed  
28 from traditional cortical language mapping protocols (Johnson & Ojemann, 2000). More  
29 recently, event-related potential recordings in patients undergoing deep brain stimulation (DBS)  
30 have suggested that thalamic structures are engaged in the analysis of syntactic, semantic and  
31 lexical information during acoustically presented language tasks (Tiedt et al., 2017; Wahl et al.,  
32 2008).

33

34 We recently developed a protocol to study subcortical activity during single-syllable  
35 word/nonword reading, in patients undergoing DBS lead implantation (Chrabaszcz et al., 2019;  
36 Lipski et al., 2018). Here, we explore whether the thalamus participates in the encoding of  
37 lexical status, by recording local field potentials (LFP) in patients undergoing DBS lead  
38 implantation for essential tremor targeting the ventral intermediate nucleus of the thalamus  
39 (Vim, which corresponds to the ventral portion of the ventral lateral posterior nucleus (VLp)  
40 (Macchi & Jones, 1997)). Subjects performed a reading aloud task where they were asked to  
41 read aloud single-syllable words or nonwords that appeared on a computer screen (Figure 1).  
42 We assessed thalamic participation in lexical status encoding by comparing task-related neural  
43 responses when participants spoke nonwords vs. words.

44

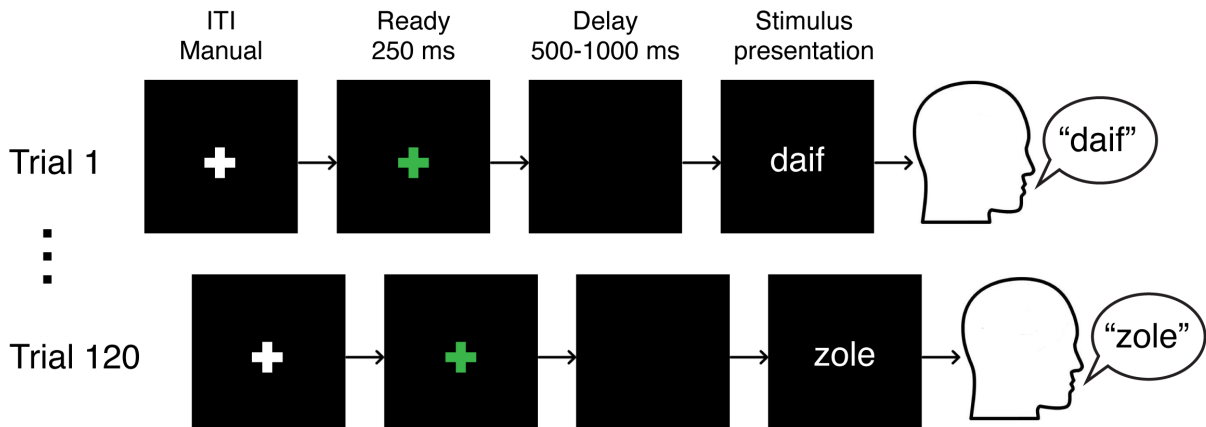

45

46 **Figure 1: Schematic of experiment.** ITI: inter-trial interval.

47

## 48 Results

49 Eleven subjects read aloud single-syllable words alternating with nonwords, intraoperatively  
50 during implantation of DBS leads targeting the Vim nucleus of the thalamus. LFP recordings in  
51 four subjects were obtained unilaterally (3 left, 1 right) during microelectrode mapping, where  
52 each of these subjects performed up to four sessions of 120 trials. Recordings from seven  
53 subjects were obtained from DBS lead contacts, where each of these subjects performed two  
54 sessions: in the first session unilateral recordings were made from the left thalamus, and in the  
55 second session bilateral recordings were performed simultaneously. A total of 117 recordings  
56 (data recorded in one location in one session) from 89 recording sites pooled across subjects  
57 were collected. Recording locations were determined in MNI (Montreal Neurological Institute)  
58 space (Figure 2) and comprised locations within or bordering (within 1mm) the ventral anterior  
59 nucleus (VA) and the ventral lateral anterior nucleus (VL<sub>a</sub>) (38/89), or the VL<sub>p</sub> (51/89).

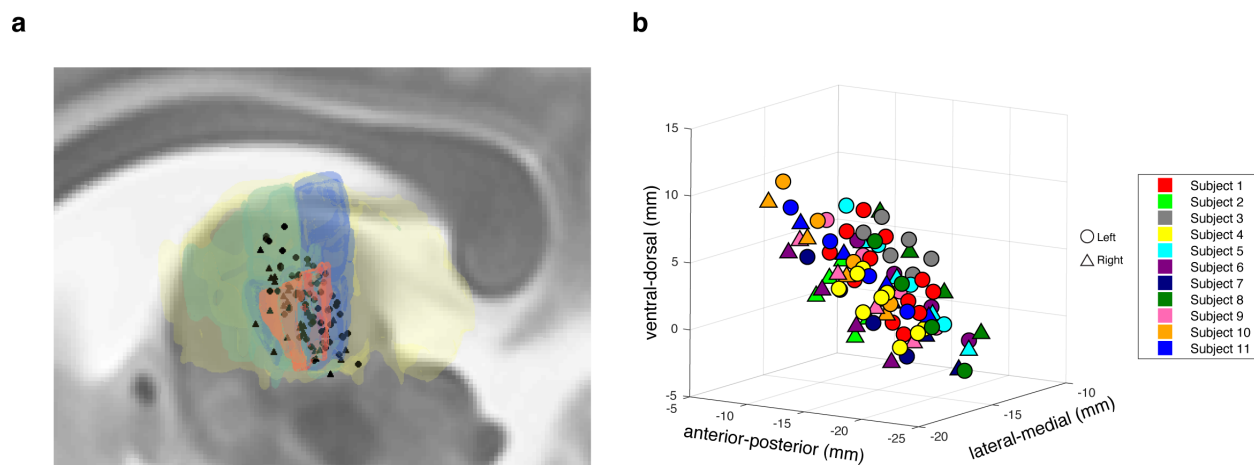

60  
61 **Figure 2: Localization and MNI-transformation of recording sites.** **a** Sagittal view of the  
62 recording locations of all the subjects relative to the thalamus (yellow), VA and VLa (green), VLp  
63 (blue), and Vim (orange), superimposed on a T2-weighted image. **b** A plot of all the recording  
64 sites in MNI space with their MNI-defined coordinates. Recording contacts of different subjects  
65 are color-coded. In both **a** and **b**, right hemisphere recording locations are flipped to the left  
66 hemisphere: left side contacts are marked with circles, and right side contacts are marked with  
67 triangles.

### 69 Behavioral performance

70 Across all subjects, the mean speech production latency (interval between stimulus presentation  
71 and onset of speech) was  $1.07 \pm 0.29$ s, and the mean duration of speech was  $0.70 \pm 0.09$ s.  
72 Nonword production latency ( $1.23 \pm 0.37$ s) was significantly longer than word production latency  
73 ( $0.98 \pm 0.24$ s) across subjects (two-tailed paired t-test,  $t(10)=4.47$ ,  $P=0.0012$ ; Figure 3a).  
74 Nonword production duration across subjects ( $0.68 \pm 0.07$ s) was not significantly different from  
75 word production duration ( $0.72 \pm 0.13$ s; two-tailed paired t-test,  $t(10)=1.99$ ,  $P=0.074$ ; Figure 3b).

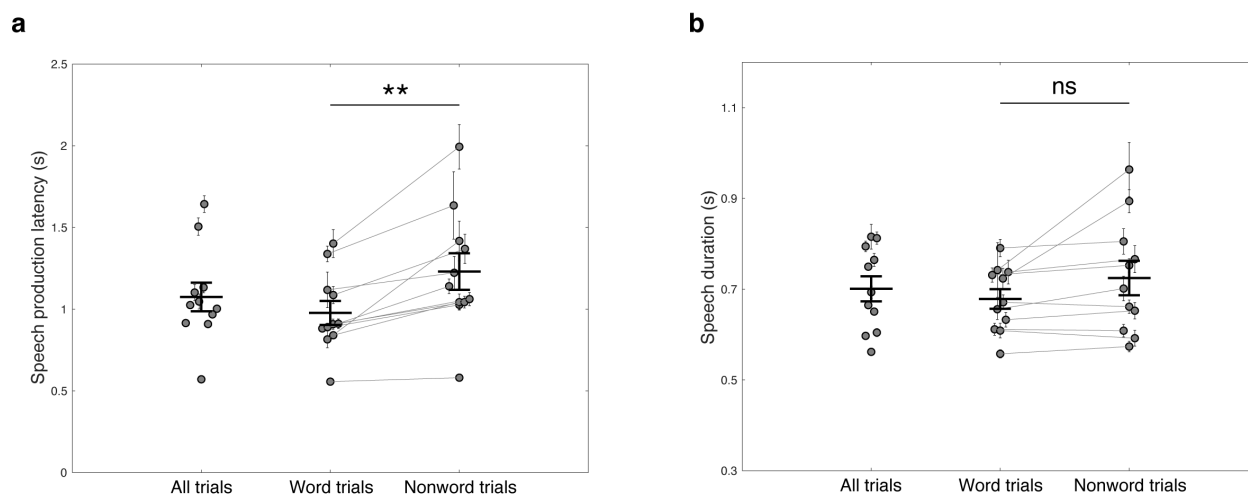

76

77 **Figure 3: Behavioral outcomes.** **a** Mean and SEM of speech production latency for each  
78 subject across all trials (first column), word trials (second column), or nonword trials (third  
79 column), superimposed with the mean and SEM of speech production latency across subjects.  
80 **b** Mean and SEM of speech duration for each subject across all trials (first column), word trials  
81 (second column), or nonword trials (third column), superimposed with the mean and SEM of  
82 speech duration across subjects. Two-tailed paired t-test,  $**P<0.01$ , ns: not significant.  
83

#### 84 **Thalamic neural activity is modulated during reading aloud**

85 Thalamic LFP activity exhibited significant time-frequency modulation during the reading aloud  
86 task (Figure 4). Compared to baseline (a period of 1000ms preceding stimulus presentation),  
87 there was a significant decrease in spectral power in the beta frequency band (12-30Hz) that  
88 occurred at stimulus presentation and lasted until the end of speech (-1.08-0.62s relative to  
89 speech onset, two-tailed Wilcoxon signed-rank test,  $n=117$ ,  $P<0.05$ , Bonferroni corrected). In  
90 contrast, a significant increase in broadband gamma (70-150Hz) activity occurred shortly before  
91 the onset of speech and persisted throughout the utterance (-0.15-0.59s relative to speech  
92 onset, two-tailed Wilcoxon signed-rank test,  $n=117$ ,  $P<0.05$ , Bonferroni corrected). Average z-  
93 scored task-related beta and broadband gamma response amplitudes of each trial were then  
94 calculated over the respective significant time windows for all the recordings. As a result, 66/117  
95 (56%) of the recordings showed significant beta activity decreases during the task compared to  
96 baseline (one-tailed one-sample t-test,  $P<0.05$ , Bonferroni corrected), and significant task-  
97 related broadband gamma activity increases were observed in 91/117 (78%) of the recordings  
98 (one-tailed one-sample t-test,  $P<0.05$ , Bonferroni corrected).  
99

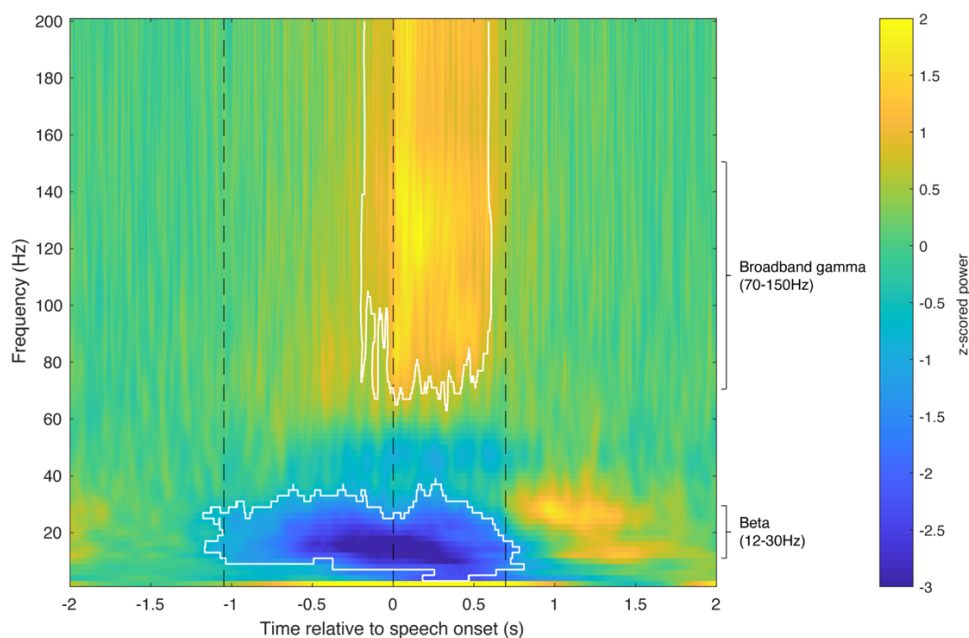

100

101 **Figure 4: Thalamic neural activity shows task-related modulations.** A spectrogram of  
102 thalamic neural activity during the reading aloud task, averaged across all trials and all  
103 recordings. Trials are aligned to speech onset. Significant changes compared to baseline are  
104 marked in white contours (-1.08-0.62s for beta activity, and -0.15-0.59s for broadband gamma  
105 activity; Wilcoxon signed-rank test,  $n=117$ ,  $P<0.05$ , Bonferroni corrected). Average time points  
106 of stimulus presentation, speech onset and offset are marked with black dashed lines.  
107

#### 108 **Beta and broadband gamma responses differ in timing properties**

109 The average interval between stimulus presentation and onset of a significant change from  
110 baseline in the spectral power of a particular frequency band, i.e. the mean band response  
111 latency, was shorter for significant beta decrease responses than for significant broadband  
112 gamma increase responses ( $0.79 \pm 0.18$ s vs.  $0.99 \pm 0.18$ s, two-tailed two-sample t-test,  $t(155)=-$   
113  $6.97$ ,  $P<10^{-5}$ ). The mean band response onset to speech onset interval was also greater for  
114 significant beta decrease responses than for significant broadband gamma increase responses  
115 ( $0.31 \pm 0.15$ s vs.  $0.13 \pm 0.14$ s, two-tailed two-sample t-test,  $t(155)=7.67$ ,  $P<10^{-5}$ ). To characterize  
116 the temporal properties of these responses, we examined their trial-to-trial relationships to  
117 stimulus presentation versus speech onset (Figure 5a-d). Of the 66 recordings that showed  
118 significant task-related beta power decreases, 43 (65.2%) had beta responses time-locked to  
119 stimulus presentation, whereas only 19 (28.8%) had beta responses time-locked to speech  
120 onset (Figure 5e). In contrast, the majority (70/91, 77.0%) of significant broadband gamma  
121 power increases were time-locked to speech onset, with a minority (19/91, 21.0%) time-locked  
122 to stimulus presentation (Figure 5f). These relationships were dissociated ( $\chi^2$  test,  $\alpha=0.05$ ;  
123 Supplementary Table 1), with beta decreases more likely to be stimulus-locked ( $\chi^2(1)=31.4$ ,  
124  $P<10^{-5}$ ) and broadband gamma increases more likely to be speech onset-locked ( $\chi^2(1)=36.1$ ,  
125  $P<10^{-5}$ ). These temporal correlations did not differ between recording sides ( $\chi^2$  test,  $\alpha=0.05$ ;  
126 Supplementary Table 2).

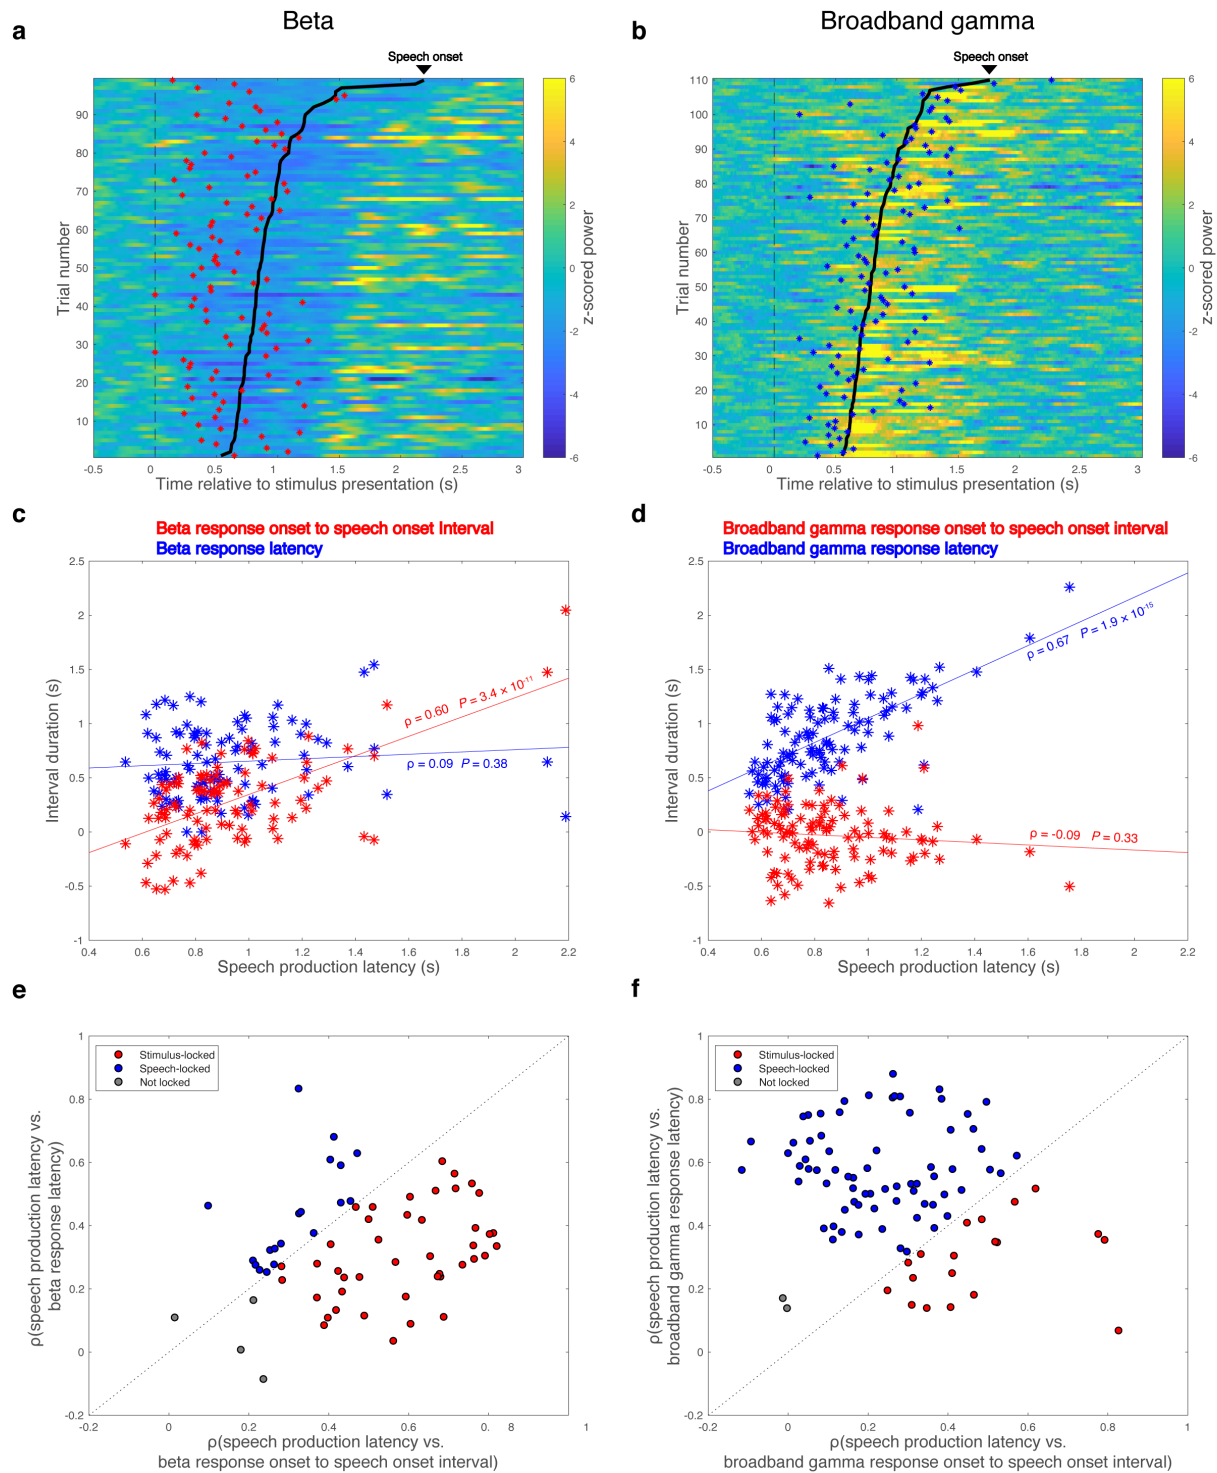

127

128 **Figure 5: Beta decrease response is locked to stimulus presentation while broadband**  
 129 **gamma increase response is locked to speech onset.** **a, b** Raster plots for beta band  
 130 responses (**a**) and broadband gamma responses (**b**) across trials of two representative  
 131 recordings. Trials are aligned to stimulus presentation (indicated with black dashed lines) and  
 132 sorted by speech production latency. Speech onsets are denoted with bold black lines. Onsets  
 133 of significant beta activity decreases are marked with red asterisks in **a** and onsets of significant



134 broadband gamma activity increases are marked with blue asterisks in **b**. **c**, **d** Band response  
135 onset to speech onset interval (red asterisks) and band response latency (blue asterisks) are  
136 correlated (Pearson's correlation,  $\alpha=0.05$ ) with speech production latency respectively, for the  
137 two representative recordings. **e**, **f** The same correlation analysis is performed for all the  
138 recordings with significant beta decrease responses and all the recordings with significant  
139 broadband gamma increase responses, and the results are summarized in **e** and **f**, respectively.  
140 Recordings locked to stimulus presentation are shown in red, recordings locked to speech onset  
141 are shown in blue, and recordings not locked to either stimulus presentation or speech onset  
142 are shown in gray.

143

#### 144 **Thalamic beta activity is selective to lexical status**

145 To investigate the involvement and lateralization of the thalamus in lexical processing, only  
146 recordings that were from subjects with bilateral lead recordings ( $n=7$ ) and that showed  
147 significant task-related modulation were included for lexicality-related analyses. As a result, 55  
148 recordings (21 unilateral session left-side recordings, 34 from bilateral session left-side (20) and  
149 right-side (14) recordings) were included for beta lexical selectivity analysis. Nonword  
150 production was associated with a greater suppression of beta power compared with reading  
151 words. These differential beta responses were observed in both hemispheres (Figure 6a, c). In  
152 the left thalamus, significant word vs. nonword beta amplitude differences occurred between  
153 0.8s and 1.8s after stimulus presentation (two-tailed paired t-test,  $n=41$ ,  $P<0.05$ , Bonferroni  
154 corrected). Similarly, significant beta amplitude differences occurred in the right thalamus at 0.2-  
155 1.7s relative to stimulus presentation (two-tailed paired t-test,  $n=14$ ,  $P<0.05$ , Bonferroni  
156 corrected).

157

158 To quantify the lexical selectivity of thalamic beta activity, a lexical selectivity index was  
159 determined for each of these recordings. We utilized the time window of significant task-related  
160 beta activity decrease (-1.08-0.62s relative to speech onset (see Figure 4)) to calculate a mean  
161 task-related beta response power value for each trial, and then the values were compared  
162 between nonword trials vs. word trials in each recording by performing a two-sample t-test. The  
163 resulting t-statistic was the beta lexical selectivity index for this recording: a beta lexical  
164 selectivity index less than zero indicated stronger beta activity decrease (thus having more  
165 negative z-scored power) during nonword trials than during word trials, and vice versa. The  
166 mean beta lexical selectivity indexes for unilateral session left-side recordings ( $-0.49 \pm 0.76$ ),  
167 bilateral session left-side ( $-0.52 \pm 0.82$ ) and right-side ( $-0.82 \pm 0.89$ ) recordings were all  
168 significantly less than zero (two-tailed one-sample t-test,  $t(20)=-2.97$ ,  $P=0.0075$ ;  $t(19)=-2.83$ ,  
169  $P=0.011$ ;  $t(13)=-3.48$ ,  $P=0.0041$ ; Figure 6e), suggesting that the magnitude of the beta

170 decrease was significantly nonword-selective in each case. There were no significant  
171 differences in beta lexical selectivity between recordings in the left and right thalamus, or  
172 between recordings from the unilateral and bilateral sessions on the left side (two-tailed two-  
173 sample t-test, unilateral session left-side recordings vs. bilateral session right-side recordings:  
174  $t(33)=1.18$ ,  $P=0.25$ ; bilateral session left-side recordings vs. bilateral session right-side  
175 recordings:  $t(32)=1.05$ ,  $P=0.30$ ; unilateral session left-side recordings vs. bilateral session left-  
176 side recordings:  $t(39)=0.093$ ,  $P=0.93$ ).

177

### 178 **Lexical selectivity of thalamic broadband gamma activity is lateralized**

179 74 recordings (26 unilateral session left-side recordings, 22 bilateral session left-side  
180 recordings, and 26 bilateral session right-side recordings) were included for broadband gamma  
181 lexical selectivity analysis. Significantly greater broadband gamma activity increases during  
182 nonword production were observed in the left thalamus, starting 0.1s after speech onset and  
183 persisting throughout the following 0.4s (two-tailed paired t-test,  $n=48$ ,  $P<0.05$ , Bonferroni  
184 corrected; Figure 6b). In the right thalamus, however, the broadband gamma response curves  
185 observed during nonword and word reading were similar, without a significant difference in  
186 response amplitudes (two-tailed paired t-test,  $n=26$ ,  $\alpha=0.05$ , Bonferroni corrected; Figure 6d).

187

188 We next calculated broadband gamma lexical selectivity indexes, using the significant time  
189 window of -0.15-0.59s relative to speech onset (see Figure 4). A broadband gamma lexical  
190 selectivity index greater than zero indicated stronger broadband gamma activity increase during  
191 nonword trials than during word trials, and vice versa. The mean broadband gamma lexical  
192 selectivity indexes of both unilateral session left-side recordings ( $0.53 \pm 0.96$ ) and bilateral  
193 session left-side recordings ( $0.46 \pm 1.00$ ) were significantly greater than zero (two-tailed one-  
194 sample t-test,  $t(25)=2.80$ ,  $P=0.0097$ ;  $t(21)=2.14$ ,  $P=0.044$ ), indicating significant correlation of  
195 the magnitude of the gamma response to lexical status (Figure 6f). In contrast, broadband  
196 gamma responses in right side recordings did not show significant lexical selectivity ( $-0.22$   
197  $\pm 0.68$ , two-tailed one-sample t-test,  $t(25)=-1.67$ ,  $P=0.11$ ). The differences in broadband gamma  
198 lexical selectivity between the left and right thalamus were demonstrated with two-tailed two-  
199 sample t-test (unilateral session left-side recordings vs. bilateral session right-side recordings:  
200  $t(50)=3.25$ ,  $P=0.0021$ ; bilateral session left-side recordings vs. bilateral session right-side  
201 recordings:  $t(46)=2.79$ ,  $P=0.0077$ ), further suggesting that selectivity of thalamic broadband  
202 gamma activity to lexical status is lateralized to the left. Recordings in the unilateral and bilateral  
203 sessions on the left side did not differ in broadband gamma lexical selectivity (two-tailed two-

204 sample t-test,  $t(46)=0.25$ ,  $P=0.80$ ), indicating the consistency of broadband gamma lexical  
 205 selectivity between task sessions.

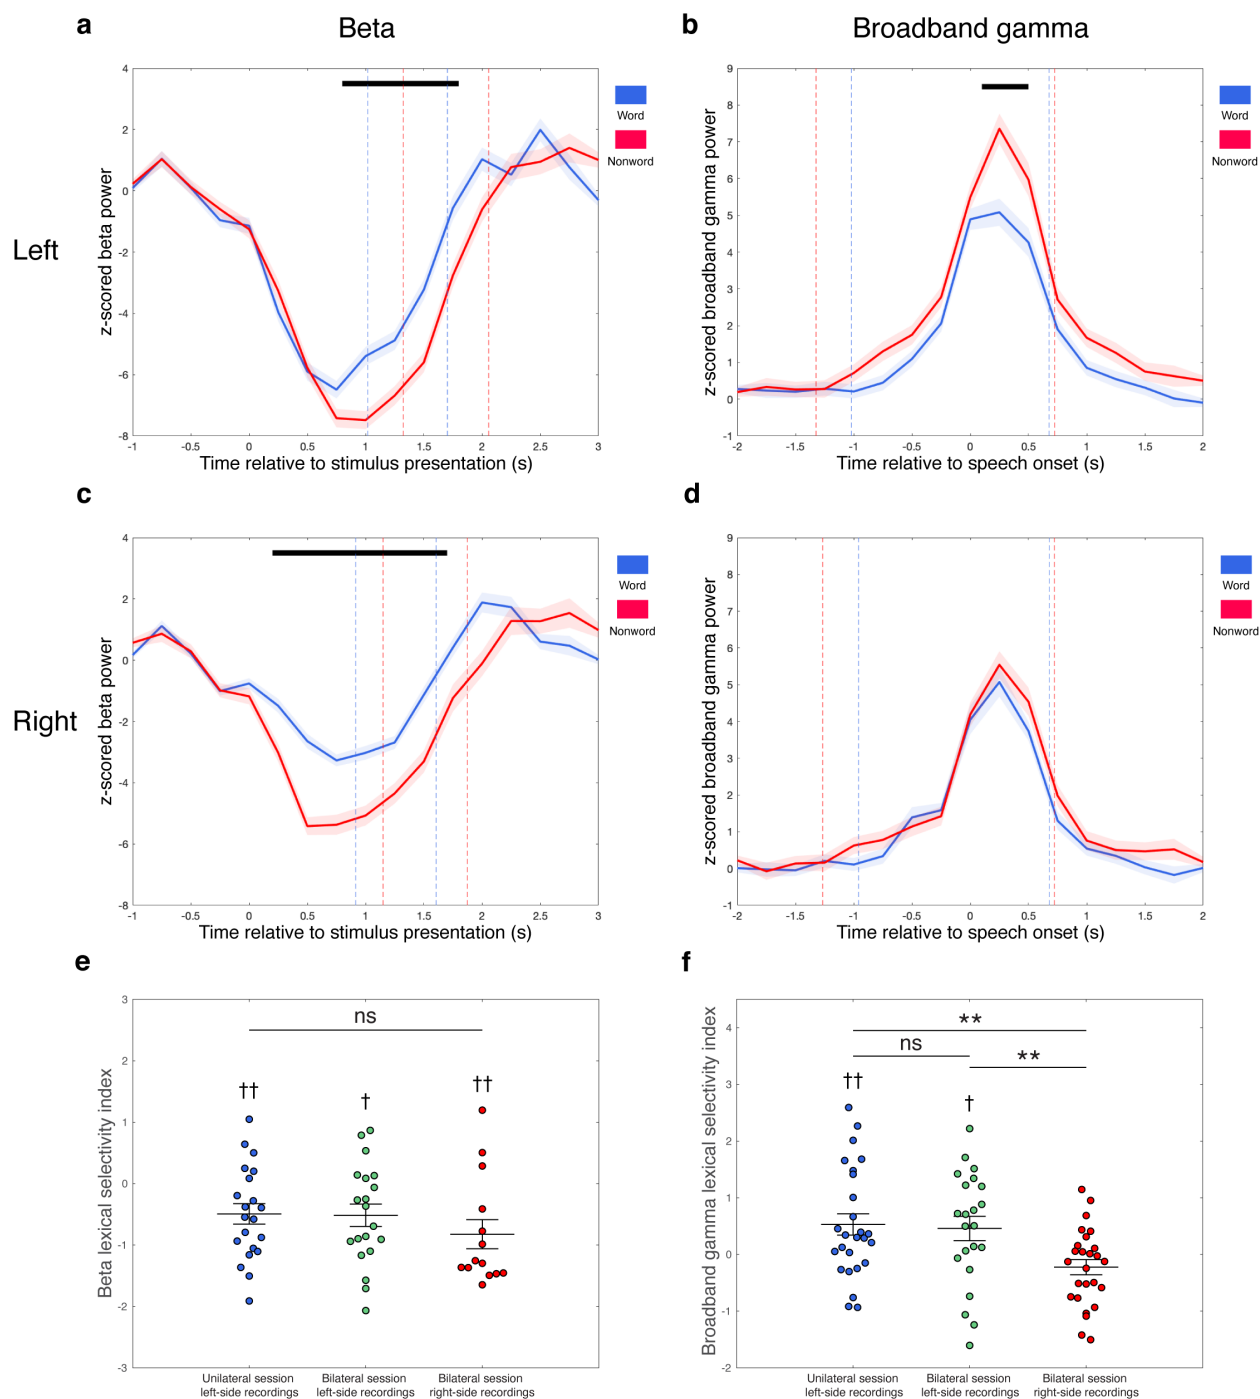

206  
 207 **Figure 6: Differential band responses during word vs. nonword reading aloud in the left**  
 208 **and right thalamus. a-d** Comparisons of average band response amplitudes during word (blue)  
 209 vs. nonword (red) reading aloud for beta band (**a, c**) and broadband gamma (**b, d**), in the left (**a,**  
 210 **b**) and right thalamus (**c, d**). Band responses are averaged across trials of respective trial types  
 211 and across recordings that showed significant task-related band responses in each side, aligned

212 to stimulus presentation for beta band (**a, c**) and speech onset for broadband gamma (**b, d**).  
213 Average time points of speech onset and end of speech are marked with dashed lines in **a** and  
214 **c**, and average time points of stimulus presentation and end of speech are marked with dashed  
215 lines in **b** and **d**, for word trials (blue) and nonword trials (red) respectively. Black bars indicate  
216 significant differences of response amplitudes between word and nonword trials (two-tailed  
217 paired t-test,  $P < 0.05$ , Bonferroni corrected). Standard errors are shaded in light colors. **e** Dot  
218 plot of beta lexical selectivity indexes of lead recordings that showed significant task-related  
219 beta decrease responses, grouped by recording sides and recording sessions (unilateral  
220 session left-side recordings in the first column, bilateral session left-side recordings in the  
221 second column, and bilateral session right-side recordings in the third column). Mean and SEM  
222 of beta lexical selectivity index across recordings of each group is superimposed on each  
223 column, respectively. **f** Dot plot of broadband gamma lexical selectivity indexes of lead  
224 recordings that had significant task-related broadband gamma increase responses, grouped by  
225 recording sides and recording sessions (unilateral session left-side recordings in the first  
226 column, bilateral session left-side recordings in the second column, and bilateral session right-  
227 side recordings in the third column). Mean and SEM of broadband gamma lexical selectivity  
228 index across recordings of each group is superimposed on each column, respectively. Two-  
229 tailed one-sample t-test,  $\dagger P < 0.05$ ,  $\dagger\dagger P < 0.01$ ; two-tailed two-sample t-test,  $**P < 0.01$ , ns: not  
230 significant.

231

### 232 **Left side broadband gamma lexical selectivity is topographically organized**

233 We observed that the recording sites in the left thalamus that were significantly nonword-  
234 selective in terms of broadband gamma response activity (broadband gamma lexical selectivity  
235 index  $> 1.645$  based on normal approximation of t-distribution) appeared to comprise more  
236 anterior locations in MNI space (Figure 7a). Pearson's correlation tests demonstrated that the  
237 broadband gamma lexical selectivity index significantly correlated with recording location along  
238 the anterior-posterior axis (MNI-defined y coordinate;  $n=48$ ,  $\rho=0.49$ ,  $P=0.00041$ ; Figure 7b) and  
239 the ventral-dorsal axis (MNI-defined z coordinate;  $n=48$ ,  $\rho=0.30$ ,  $P=0.041$ ; Supplementary  
240 Figure 1a), but not the lateral-medial axis (MNI-defined x coordinate;  $n=48$ ,  $\rho=-0.14$ ,  $P=0.34$ ;  
241 Supplementary Figure 1b) within the left thalamus. To avoid multicollinearity and to test out  
242 possible interactions between variables, a stepwise linear regression model was applied, which  
243 determined that the anterior-posterior location of the recording was the only significant predictor  
244 (estimated coefficient=0.17, SE=0.044,  $P=0.00041$ ), while neither the ventral-dorsal location  
245 ( $P=0.72$ ) nor the interaction between ventral-dorsal location and anterior-posterior location  
246 ( $P=0.14$ ) explained the result. In order to control for subject differences and session differences,  
247 we further fitted linear mixed effects models to the data, entering subject and session as random  
248 effects. The results indicate that even after accounting for subject and session variability, the  
249 broadband gamma lexical selectivity index in the left thalamus had a significant gradient along

250 the anterior-posterior axis, with greater broadband gamma lexical selectivity index more likely to  
251 be observed anteriorly (estimated coefficient=0.17, SE=0.043,  $P=0.00032$ ). Based on the linear  
252 mixed effects modeling results, neither ventral-dorsal location (estimated coefficient=0.061,  
253 SE=0.035,  $P=0.087$ ) nor lateral-medial location (estimated coefficient=-0.11, SE=0.093,  $P=0.24$ )  
254 of the recording had significant effect on broadband gamma lexical selectivity in the left  
255 thalamus. Taken together, these results suggest that broadband gamma lexical selectivity is  
256 dependent on the anterior-posterior location of the recording in the left ventral lateral thalamus,  
257 with greater nonword selectivity more likely to occur anteriorly.

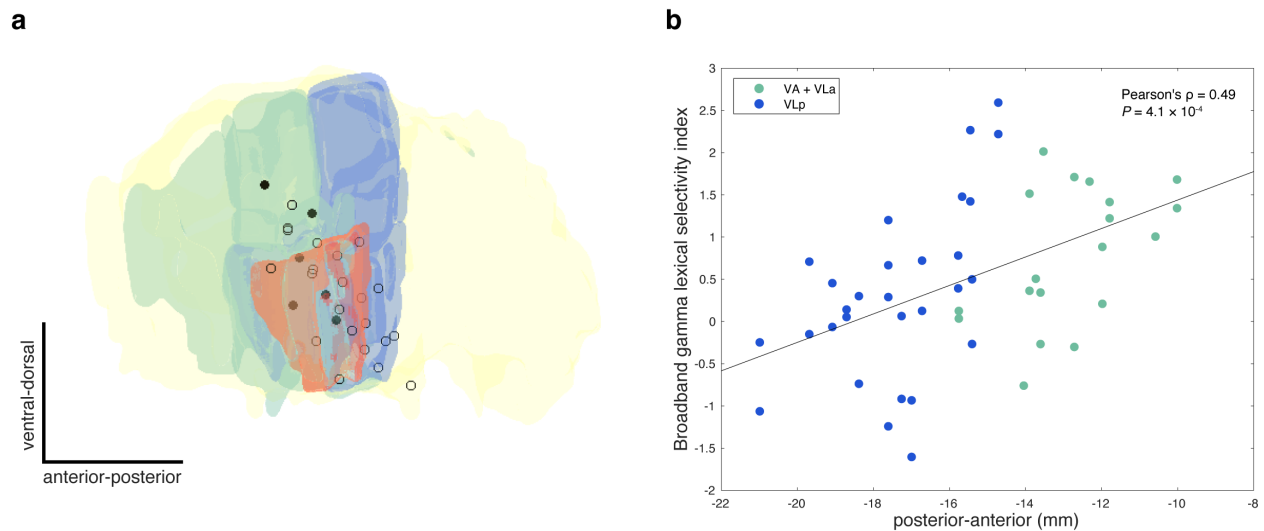

258

259 **Figure 7: Broadband gamma lexical selectivity depends on anterior-posterior location of**  
260 **the recording in the left thalamus. a** Left side lead recording sites are plotted together with  
261 anatomical structures (thalamus in yellow, VA and VLc in green, VLp in blue, and Vim in  
262 orange), viewed from a lateral direction. Recording sites where significantly nonword-selective  
263 recordings in terms of broadband gamma response amplitudes (broadband gamma lexical  
264 selectivity index > 1.645 based on normal approximation of t-distribution) were observed in either  
265 session are filled with black, and remaining recording sites are shown in open circles. **b**  
266 Broadband gamma lexical selectivity indexes of left side lead recordings that showed significant  
267 task-related broadband gamma responses are correlated (Pearson's correlation,  $\alpha=0.05$ ) with  
268 recording locations along the anterior-posterior axis (y coordinates in MNI space). Recordings  
269 inside VA or VLc are green-colored and recordings inside VLp are blue-colored.

270

271 No significant correlation (Pearson's correlation,  $\alpha=0.05$ ) between broadband gamma lexical  
272 selectivity index and recording location was observed for right side recordings (Supplementary  
273 Figure 2 and 3), or for beta lexical selectivity on either side (Supplementary Figure 4 and 5), by  
274 any statistical modeling. These results suggest that the topography of lexical selectivity is  
275 unique to broadband gamma responses in the left thalamus.

276

## 277 **Discussion**

278 Subcortical contributions to language production have been hypothesized largely from  
279 correlations of focal brain damage with aphasic syndromes and from language studies using  
280 functional magnetic resonance imaging (fMRI) or scalp electroencephalography (EEG) (Hebb &  
281 Ojemann, 2013). Our results are the first to demonstrate thalamic neural activity during reading  
282 aloud. We discovered that the encoding of lexical status is differentially represented in thalamic  
283 neural activity. Whereas greater beta activity decrease occurred during nonword trials as  
284 compared to word trials in both hemispheres, greater gamma increases in the left but not right  
285 thalamus were associated with the spoken production of nonwords as compared to words.  
286 Importantly, the level of broadband gamma lexical selectivity was greater in more anterior  
287 thalamic recording locations, regions more likely to receive basal ganglia than cerebellar  
288 afferents (Alexander et al., 1986).

289  
290 We first observed that thalamic beta activity showed a task-related decrease, locked to stimulus  
291 presentation, consistent with the expected beta desynchronization that accompanies motor  
292 action. Beta oscillations are proposed to signal the maintenance of current sensorimotor and  
293 cognitive states (Engel & Fries, 2010), and event-related beta activity decreases during the  
294 preparation and the execution of voluntary movements have been observed across relevant  
295 brain regions, including the thalamus (Klostermann et al., 2007; Kühn et al., 2004; Paradiso,  
296 2004; Tzagarakis et al., 2010). Beta activity was reduced across the entirety of each task event,  
297 which requires a series of underlying neural dynamics (processing the visual stimulus, retrieval  
298 of lexical information, encoding of the phonological information, and execution of articulatory  
299 movement), suggesting a state change that facilitated the process of speech production.  
300 Significant increases in broadband gamma activity began before but were predominantly locked  
301 to speech onset. Given that broadband gamma activity is thought to index synchronized local  
302 neuronal firing (Ray et al., 2008; Ray & Maunsell, 2011) and is associated with the functional  
303 activation of relevant brain regions during a wide range of sensorimotor and cognitive tasks,  
304 including speech and language processing (Bouchard et al., 2013; Chrabaszcz et al., 2019;  
305 Crone et al., 2006; Juphard et al., 2011; Uhlhaas et al., 2011), our data suggest that the ventral  
306 lateral thalamus tracks speech production.

307  
308 Studies of the brain networks involved in lexical processing during reading primarily have been  
309 confined to cortical regions (Dietz et al., 2005; Fiez et al., 1999; Hagoort et al., 1999; Heim et  
310 al., 2005; Herbster et al., 1997; Juphard et al., 2011; Mechelli et al., 2003; Xu, 2001). In this

311 study, we utilized the balanced design of words and nonwords in the stimulus sets and  
312 simultaneous bilateral recordings in the seven participants to determine whether lexical  
313 processing is differentially represented in the thalamus during reading aloud. Thalamic  
314 broadband gamma oscillations showed significantly stronger activation during nonword reading  
315 aloud than during word reading aloud, which evolved around speech onset and was present  
316 throughout the entire utterance. Notably, this broadband gamma lexical selectivity was found  
317 only in recordings from the left side. According to classic speech production models (Levelt et  
318 al., 1999), the time course of the observed broadband gamma activity difference between word  
319 and nonword trials corresponded to the articulatory stage of reading aloud. It is unlikely that this  
320 lexicality effect was motoric, considering that the motor complexity was balanced between word  
321 and nonword stimuli, and that this differential broadband gamma modulation was not  
322 equivalently observed in the right hemisphere. In fact, the dual-route theory of reading aloud has  
323 suggested that words and nonwords are read aloud differently: while real words can be read  
324 aloud via either grapheme-to-phoneme conversions or direct word-to-sound mapping, nonwords  
325 can only be read aloud via grapheme-to-phoneme conversions (Coltheart et al., 2001). It is  
326 possible that phonological encoding was still ongoing during nonword production, after a failed  
327 internal lexicon lookup procedure. Indeed, stronger gamma (50-150Hz) responses for pseudo-  
328 words than for words have been reported in Broca's area (Brodmann's areas 44 and 45) during  
329 silent word reading, where the length of this differential response increased with the length of  
330 the stimuli (Juphard et al., 2011). In addition, it is possible that reading aloud nonwords created  
331 a learning or error correction demand (Hickok, 2014). We propose that the lexicality effect on  
332 thalamic broadband gamma activity during reading may reflect left thalamic participation in  
333 phonological encoding, learning, and feedback monitoring during speech and language  
334 processing. Although previous studies have supported a lateralized thalamic role in language  
335 (Johnson & Ojemann, 2000), our results from simultaneous bilateral direct recordings in the  
336 thalamus are the first to provide direct supporting evidence.

337  
338 A topography for broadband gamma lexical selectivity was observed in the left thalamus. The  
339 lexical selectivity of the broadband gamma response was significantly correlated with the  
340 anterior-posterior location of recording sites in the left thalamus, with a higher lexical selectivity  
341 more likely to appear anteriorly. In contrast, a gradient for broadband gamma lexical selectivity  
342 was not observed in the right thalamus. This finding further supports a unique language role  
343 lateralized to the left thalamus, and suggests functional heterogeneity in the left ventral lateral  
344 thalamus during speech and language processing. The anterior portion (VA and VLa) receives

345 input primarily from the internal globus pallidus and substantia nigra pars reticulata, and has  
346 strong connections with frontal cortex, including Broca's area (Alexander et al., 1986; Behrens  
347 et al., 2003; Bosch-Bouju et al., 2013; Hintzen et al., 2018; Hwang et al., 2017; Zhang et al.,  
348 2010). Broca's area has consistently been associated with lexico-phonological processing (Dietz  
349 et al., 2005; Fiez et al., 1999; Hagoort et al., 1999; Heim et al., 2005; Herberster et al., 1997;  
350 Juphard et al., 2011; Mechelli et al., 2003; Xu, 2001). Thus, this thalamic region may participate  
351 in differential lexical processing during nonword vs. word reading aloud in concert with Broca's  
352 area. In contrast, the posterior region (VLp), which receives cerebellar projections and  
353 preferentially sends output to primary motor cortex (Behrens et al., 2003; Bosch-Bouju et al.,  
354 2013; Hintzen et al., 2018; Hwang et al., 2017; Zhang et al., 2010), might be more related to  
355 motor control of a selected motor plan. This idea is supported by previous stimulation studies  
356 that have reported location-dependent effects of thalamic stimulation on speech and language:  
357 stimulation of VLa could cause acceleration of language processes, while stimulation of VLp  
358 often affected motor aspects of speech, such as perseveration and stuttering speech (Hebb &  
359 Ojemann, 2013). We note that VA has been proposed to participate in selection of a language  
360 unit during speech production, via basal ganglia-thalamo-cortical loop interactions (Crosson,  
361 2013); it also is included in the "planning loop" in the GODIVA model of speech production  
362 (Bohland et al., 2010).

363  
364 In contrast, although significantly stronger nonword-related than word-related beta activity  
365 decreases accompanied the reading aloud task bilaterally, neither lateralization nor topography  
366 was observed for thalamic beta lexical selectivity. Therefore, beta activity decreases likely  
367 represent nonspecific changes of cognitive and sensorimotor states that prepare the entire  
368 thalamo-cortical network for a behavioral change. Note that in the current work we did not try to  
369 compare task-related band response strength between different recording locations and  
370 different recording sides among subjects and sessions, because of a number of uncontrollable  
371 factors that affect the band oscillatory power (e.g. recording impedances and baseline neural  
372 activity are variable across subjects, sessions, and recording sides). In contrast, the lexical  
373 selectivity index, which was calculated by comparing word-related and nonword-related band  
374 response strength within each recording, is mostly independent of those factors and thus  
375 comparable at the group level. This idea is supported by the fact that lexical selectivity indexes  
376 in both beta and broadband gamma bands remained consistent across sessions.

377



378 In summary, our results are the first demonstration of time-frequency modulations of thalamic  
379 neural activity during reading aloud. These data suggest that lateralized and topographically  
380 organized thalamic pathways participate in speech production differently, based on whether a  
381 word or nonword is being read.

382

## 383 **Materials and methods**

### 384 **Subjects**

385 Eleven human subjects (3 females, 68.4 ±8.0 years) with essential tremor undergoing awake  
386 DBS implantation surgery targeting the Vim nucleus of the thalamus were studied. All  
387 participants were right-handed native English speakers. None had significant cognitive  
388 impairment based on a detailed neuropsychological evaluation performed during clinical  
389 evaluation for DBS surgery. All but one underwent bilateral (left side first) DBS lead implantation  
390 (one subject had one lead implanted in the left hemisphere previously and underwent right side  
391 lead implantation in the current study). Full demographic description of subjects is provided in  
392 Table 1. All protocols were approved by the Institutional Review Board of the University of  
393 Pittsburgh (IRB Protocol #PRO13110420), and all participants gave written informed consent.

394 **Table 1: Subject characteristics.**

| Subject | Age | Gender | Handedness | MMSE  | LFP recording side | LFP recording type | Number of recordings | Mean number of trials per session | Trials rejected, % |
|---------|-----|--------|------------|-------|--------------------|--------------------|----------------------|-----------------------------------|--------------------|
| 1       | 61  | Male   | Right      | NR    | Left               | Mapping electrodes | 12                   | 111                               | 7                  |
| 2       | 70  | Female | Right      | 30/30 | Right              | Mapping electrodes | 6                    | 107                               | 11                 |
| 3       | 66  | Male   | Right      | NR    | Left               | Mapping electrodes | 6                    | 116                               | 3                  |
| 4       | 75  | Male   | Right      | 26/30 | Left               | Mapping electrodes | 9                    | 112                               | 5                  |
| 5       | 64  | Male   | Right      | 30/30 | Both               | DBS leads          | 12                   | 104                               | 13                 |
| 6       | 53  | Male   | Right      | NR    | Both               | DBS leads          | 12                   | 113                               | 5                  |
| 7       | 67  | Male   | Right      | 26/30 | Both               | DBS leads          | 12                   | 111                               | 7                  |
| 8       | 71  | Male   | Right      | 26/30 | Both               | DBS leads          | 12                   | 108                               | 9                  |
| 9       | 84  | Female | Right      | 30/30 | Both               | DBS leads          | 12                   | 118                               | 2                  |
| 10      | 73  | Female | Right      | 30/30 | Both               | DBS leads          | 12                   | 109                               | 9                  |
| 11      | 68  | Male   | Right      | 28/30 | Both               | DBS leads          | 12                   | 114                               | 5                  |

395 MMSE: Mini-Mental State Examination; NR: not recorded.

396

397 **Stimuli and experimental paradigm**

398 Subjects performed a reading aloud task either in the course of subcortical mapping procedure  
 399 during the surgery (4/11 subjects with mapping electrode recordings) or after the placement of  
 400 DBS lead in each side (7/11 subjects with lead electrode recordings). For the 4 subjects with  
 401 mapping electrode recordings, each subject performed up to 4 task sessions, while the 7  
 402 subjects with lead electrode recordings each performed 2 task sessions (the first session  
 403 occurred after left lead was implanted, and the second session took place after bilateral  
 404 implantation was completed). Each session included 120 trials. The stimuli were consonant-  
 405 vowel-consonant (CVC) words and nonwords that were presented on a computer screen. Four  
 406 lists of 120 stimuli (Supplementary Table 3) were constructed based on a previous work (Moore  
 407 et al., 2017). The first 60 stimuli of each list alternated between unique words and nonwords,  
 408 and those words and nonwords were balanced along a number of psycholinguistic features,  
 409 including phoneme probability, phonological neighborhood density, bigram frequency, and

410 biphone probability (see Supplementary Table 4 for the results of statistical comparisons (two-  
411 tailed two-sample t-test,  $n=60$ ,  $\alpha=0.05$ ) between the two conditions in terms of these  
412 psycholinguistic parameters, which were calculated using the English Lexicon Project database  
413 (Balota et al., 2007)). The nonwords were duplicated twice to construct the last 60 stimuli of  
414 each list. One of the four stimulus lists was presented to the subjects during each task session.  
415 For lexicality-related analyses, only the first 60 trials of each session were used.

416  
417 The experimental paradigm was programmed using MATLAB (MathWorks, Natick, MA) and  
418 Psychophysics Toolbox extensions (Brainard, 1997). A schematic of the experiment is shown in  
419 Figure 1. Before each trial, a white fixation cross was presented on the screen. Each trial was  
420 initiated manually by the experimenter, with the appearance of a green fixation cross on the  
421 screen. The green fixation cross lasted 250ms, and was followed by a variable time delay (500-  
422 1000ms) during which the screen remained black. Then the CVC syllable stimulus was  
423 presented in white on the screen, and subjects were instructed to read it aloud. The text  
424 remained on the screen until the subjects finished speaking. A white fixation cross was  
425 presented on the screen during the inter-trial interval (ITI).

426

#### 427 **Electrophysiological recordings**

428 For the 4/11 subjects where physiological subcortical mapping was administered, LFP  
429 recordings were performed using the Neuro-Omega recording system (Alpha Omega, Nazareth,  
430 Israel) and mapping electrodes that have a stainless steel macroelectrode ring (0.55mm in  
431 diameter, 1.4mm in length) 3mm above the tip, while in the other 7/11 subjects LFP signal was  
432 recorded from Medtronic Model 3387 DBS leads (Medtronic, Minneapolis, MN) with four  
433 platinum-iridium electrodes (1.27mm in diameter, 1.5mm in length) that are spaced 1.5mm  
434 apart, using Grapevine Neural Interface Processor (Ripple LLC, Salt Lake City, UT). The  
435 mapping electrodes and the DBS leads targeted the Vim. For subjects with mapping electrode  
436 recordings, three mapping electrodes were placed in three trajectories (anterior, central, and  
437 posterior or central, posterior, and medial) of a standard cross-shaped Ben-Gun array with a  
438 2mm center-to-center spacing, and made simultaneous recordings starting at 15mm above the  
439 surgical target with manual advance in 0.1mm steps. The reading aloud task was carried out in  
440 pauses during subcortical mapping procedure and subjects performed in up to four recording  
441 sessions, with each session corresponding to a different recording depth. Mapping electrode  
442 recordings were performed only during the left side implantation except for one subject who  
443 underwent unilateral implantation in the right side, and thus got mapping electrode recordings

444 only in the right side. For subjects with DBS lead electrode recordings, the task was  
445 administered in two recording sessions, one after the implantation of the DBS lead in the left  
446 side, receiving recordings from only the left DBS lead electrodes, and the other after bilateral  
447 DBS lead implantation was completed, receiving simultaneous recordings from bilateral lead  
448 electrodes. The LFP signal recorded from mapping electrodes was sampled at 44kHz and  
449 bandpass filtered from 0.075Hz to 10kHz, and data recorded from DBS lead electrodes were  
450 collected at 30kHz. Signal collected in one recording site in one session counted as one  
451 recording. Subject recording characteristics are summarized in Table 1.

452

### 453 **Audio recordings**

454 Subjects' speech signal was recorded using an omnidirectional microphone (Audio-Technica  
455 model ATR3350iS Mic, frequency response 50-18,000Hz (Audio-Technica, Machida, Japan) for  
456 6 subjects, and PreSonus model PRM1 Precision Flat Frequency Mic, frequency response 20-  
457 20,000Hz (PreSonus, Baton Rouge, LA) for 5 subjects) placed approximately 8cm away from  
458 the subject's mouth and oriented at an angle of about 45°. The audio signal was collected by  
459 Grapevine Neural Interface Processor at a sampling frequency of 30kHz. For subjects with  
460 mapping electrode recordings, the audio signal was then synchronized with neural signal  
461 recorded by the Neuro-Omega system using digital pulses delivered to both recording systems  
462 via a USB data acquisition unit (model USB-1208FS, Measurement Computing, Norton, MA).

463

### 464 **Electrode localization**

465 DBS lead electrodes and mapping electrodes were localized using LEAD-DBS toolbox (Horn et  
466 al., 2019; Horn & Kühn, 2015). Postoperative brain scans were coregistered to preoperative  
467 brain scans using open-source Advanced Normalization Tools (ANTs). Pre- and postoperative  
468 acquisitions were then normalized into MNI ICBM152 NLIN 2009b stereotactic space (Fonov et  
469 al., 2011). Both coregistration and normalization results underwent manual quality check. Semi-  
470 automatic reconstruction of electrodes in MNI space was performed in LEAD-DBS and MNI-  
471 defined coordinates were determined for all the electrode contacts (Figure 2). A digitized and  
472 normalized to MNI space version of the Ewert atlas (Ewert et al., 2018) was used to categorize  
473 the electrode contacts. A contact was assigned to a nucleus if it was within or in the vicinity of  
474 the nucleus (1mm cut-off) based on the minimum Euclidean distance between the contact and  
475 the voxels of the nucleus.

476

### 477 **Data pre-processing**

478 The audio signal was segmented into trials and the speech sound was coded by communication  
479 science students trained in phonetics in a custom-designed graphical user interface  
480 implemented in MATLAB. The coding results were manually checked by a speech-language  
481 pathologist. For each trial, (1) the onset of speech was identified, (2) the end of speech was  
482 identified, and (3) the speech content was identified. Trials were considered to have correct  
483 speech responses and were included in further analyses if they met all the following criteria: (1)  
484 the subject's speech response could be clearly identified by the coder, (2) the subject's  
485 response was a CVC syllable consisting of the targeted phonemes, and (3) the response did not  
486 make nonword into a word or word into a nonword.

487

488 Electrophysiological data were pre-processed using custom code based on FieldTrip toolbox  
489 (Oostenveld et al., 2011) in MATLAB. The data were resampled at 1kHz and band-pass filtered  
490 from 2 to 400Hz. The data were also notch-filtered at 60Hz and its' harmonics to remove line  
491 noise. Time series data from all recording sites were visually and quantitatively inspected for  
492 quality control. The data were then segmented into trials, each spanning 2s before stimulus  
493 presentation to 2s after the end of speech. Trials with artefacts or excessive noise were  
494 identified both manually and quantitatively, and were excluded for subsequent analyses.

495 Combined with trials that did not meet the criteria for correct speech responses, an average 6.9  
496  $\pm$ 3.4% of trials per subject were rejected (Table 1). The remaining data were common-average  
497 referenced to minimize noise. For spectral-temporal analysis, the data were decomposed using  
498 Morlet wavelet transformation (width=7) over frequencies of 2Hz to 200Hz in increment steps of  
499 2Hz. For band activity analyses, instantaneous analytic amplitudes of beta and broadband  
500 gamma frequency bands were extracted from respective bandpass filters using Hilbert  
501 transform (MATLAB function *hilbert*). The resulting signal of each trial was z-scored relative to  
502 the baseline (a period of 1000ms preceding stimulus presentation).

503

#### 504 **Task-related responses**

505 Time-frequency data were averaged across all trials centering on speech onset (from 2s before  
506 speech onset to 2s after speech onset), z-scored to baseline, and then averaged across all  
507 recordings. Nonparametric two-tailed Wilcoxon signed-rank test was performed to determine  
508 significant time-frequency modulations compared to baseline ( $n=117$ ,  $\alpha=0.05$ , Bonferroni  
509 corrected). Significant time windows for beta and broadband gamma determined by the  
510 statistical results were used to calculate a mean beta response strength and mean broadband  
511 gamma response strength for each trial in each recording. Then one-tailed one-sample t-test

512 was performed on each recording to determine recordings that had significant beta activity  
513 decreases and recordings that had significant broadband gamma activity increases, respectively  
514 ( $\alpha=0.05$ , Bonferroni corrected).

515

### 516 **Locking analysis**

517 In an effort to characterize the timing properties of beta decrease response and broadband  
518 gamma increase response for recordings with significant task-related changes in either band  
519 activity, we examined the trial-to-trial relationships of significant band response onsets to  
520 stimulus presentation versus speech onset in these recordings. First, beta or broadband gamma  
521 time series data of each trial were smoothed using a moving average kernel of 200ms (MATLAB  
522 function *smoothdata*) and z-scored to baseline, in order to minimize single-trial noise. For  
523 recordings with significant beta decrease responses, a thresholding method with a critical value  
524 of  $z=-1.645$  was applied to determine the onset of beta response for each trial. Specifically, for  
525 each trial, the period with band response power below the threshold that gave minimum  
526 summed activity was considered as activation period and the beginning of the period was  
527 determined as onset of beta response. For recordings with significant broadband gamma  
528 increase responses, the onset of broadband gamma increase was determined in a similar way,  
529 except that a critical value of  $z=1.645$  was used and period of maximum summed activity above  
530 the threshold was considered as activation period. For each band, a trial of one recording was  
531 discarded for locking analysis if no beyond-threshold period was present throughout the trial.  
532 Two intervals were calculated for each trial: (1) the interval between stimulus presentation and  
533 the onset of significant band response (band response latency), and (2) the interval between the  
534 onset of significant band response and the onset of speech. Then the two intervals were  
535 correlated (Pearson's correlation,  $\alpha=0.05$ ) with speech production latency (interval between  
536 stimulus presentation and onset of speech) across trials for each recording, respectively. The  
537 band response of a recording was considered to be more time-locked to stimulus presentation,  
538 if (1) band response onset to speech onset interval was significantly correlated with speech  
539 production latency, and (2) the correlation coefficient (Pearson's  $\rho$ ) between band response  
540 onset to speech onset interval and speech production latency was greater than the correlation  
541 coefficient between band response latency and speech production latency. On the contrary, the  
542 band response was considered to be more time-locked to speech onset, if (1) band response  
543 latency was significantly correlated with speech production latency, and (2) the correlation  
544 coefficient between band response latency and speech production latency was greater than the  
545 correlation coefficient between band response onset to speech onset interval and speech

546 production latency. If a band response did not meet any of the two criteria, it was considered not  
547 locked to either stimulus presentation or speech onset.  $\chi^2$  tests were performed to differentiate  
548 the locking properties of broadband gamma increase response and beta decrease response,  
549 and to test if the locking properties differed between recording sides ( $\alpha=0.05$ ).

550

### 551 **Lexical selectivity analysis**

552 We utilized the first 60 trials of recordings that were from the seven subjects with bilateral data  
553 and that showed significant task-related modulations in beta or broadband gamma activity to  
554 make comparisons between the left and right thalamus in terms of band lexical selectivity. A  
555 mean z-scored band response curve averaged across trials and across recordings was  
556 obtained for each frequency band, each trial type (word/nonword), in each side. Trials were  
557 aligned to stimulus presentation for beta and aligned to speech onset for broadband gamma,  
558 based on their respective locking properties. Periods of significant differences between word-  
559 related responses and nonword-related responses were determined with two-tailed paired t-test  
560 using a sliding window of 100ms ( $\alpha=0.05$ , Bonferroni corrected).

561

562 To quantify the extent of band response difference between word and nonword trials, beta  
563 lexical selectivity indexes and broadband gamma lexical selectivity indexes were calculated for  
564 respective recordings. For each recording, the mean response power values of a particular  
565 frequency band over the corresponding significant time window determined before (see **Task-**  
566 **related responses**) were calculated for word trials and nonword trials. Two-sample t-test was  
567 then performed between nonword-related power values and word-related power values, and the  
568 resulting t-statistic was the lexical selectivity index of that frequency band for that recording. For  
569 beta, a lexical selectivity index smaller than zero meant that the recording showed stronger beta  
570 activity decrease (thus having more negative z-scored power) during nonword trials than during  
571 word trials, and vice versa. For broadband gamma, a lexical selectivity index greater than zero  
572 indicated that the recording showed stronger broadband gamma activity increase during  
573 nonword reading aloud than during word reading aloud, and vice versa. The beta or broadband  
574 gamma activity of a recording was considered significantly nonword-selective, if lexical  
575 selectivity index was smaller than -1.645 for beta or greater than 1.645 for broadband gamma  
576 (normal approximation of t-distribution). Two-tailed one-sample t-test was performed to test if  
577 lexical selectivity indexes of a selected group of recordings were significantly different from zero  
578 ( $\alpha=0.05$ ). Two-tailed two-sample t-test was performed to test if lexical selectivity indexes  
579 significantly differed between two groups of recordings ( $\alpha=0.05$ ).

580

### 581 **Analysis of location dependency of lexical selectivity**

582 We further sought to examine possible dependence of band lexical selectivity on recording  
583 location, for both beta band and broadband gamma and in both left and right recording sides.  
584 Several regression models were applied to the data. First, simple linear regression (Pearson's  
585 correlation,  $\alpha=0.05$ ) was performed to correlate lexical selectivity index with recording location:  
586 anterior-posterior location (MNI-defined y coordinate), ventral-dorsal location (MNI-defined z  
587 coordinate), and lateral-medial location (MNI-defined x coordinate), respectively. A series of  
588 stepwise linear regression models (MATLAB function *stepwiselm*, response variable: lexical  
589 selectivity index, predictor variables: MNI-defined x, y, z coordinates and their interactions,  
590  $\alpha=0.05$ ) were then carried out to test out possible variable interactions, minimize  
591 multicollinearity, and determine the final location dependency model of band lexical selectivity.  
592 Finally, in order to account for possible lexical selectivity differences that might exist due to  
593 subject- and session-specific variations, linear mixed effects models (MATLAB function *fitglme*)  
594 were also applied to the data, setting subject and session as random effects.

595

### 596 **Acknowledgments**

597 This work was supported by NIH grant U01NS098969 to R.M.R., the Hamot Health foundation  
598 to R.M.R., and a University of Pittsburgh Brain Institute NeuroDiscovery Pilot Research Award  
599 to R.M.R. This work was supported by the University of Pittsburgh-Tsinghua University Scholars  
600 Program to D.W.

601

### 602 **Competing interests**

603 The authors declare no competing interests.

604

### 605 **References**

- 606 Alexander, G. E., DeLong, M. R., & Strick, P. L. (1986). Parallel Organization of Functionally  
607 Segregated Circuits Linking Basal Ganglia and Cortex. *Annual Review of Neuroscience*,  
608 9(1), 357–381. <https://doi.org/10.1146/annurev.ne.09.030186.002041>
- 609 Balota, D. A., Yap, M. J., Cortese, M. J., Hutchison, K. A., Kessler, B., Loftis, B., Neely, J. H.,  
610 Nelson, D. L., Simpson, G. B., & Treiman, R. (2007). The english lexicon project. In  
611 *Behavior Research Methods* (Vol. 39, Issue 3, pp. 445–459). Springer New York LLC.  
612 <https://doi.org/10.3758/BF03193014>



- 613 Behrens, T. E. J., Johansen-Berg, H., Woolrich, M. W., Smith, S. M., Wheeler-Kingshott, C. A.  
614 M., Boulby, P. A., Barker, G. J., Sillery, E. L., Sheehan, K., Ciccarelli, O., Thompson, A. J.,  
615 Brady, J. M., & Matthews, P. M. (2003). Non-invasive mapping of connections between  
616 human thalamus and cortex using diffusion imaging. *Nature Neuroscience*, *6*(7), 750–757.  
617 <https://doi.org/10.1038/nn1075>
- 618 Bohland, J. W., Bullock, D., & Guenther, F. H. (2010). Neural representations and mechanisms  
619 for the performance of simple speech sequences. *Journal of Cognitive Neuroscience*,  
620 *22*(7), 1504–1529. <https://doi.org/10.1162/jocn.2009.21306>
- 621 Bosch-Bouju, C., Hyland, B. I., & Parr-Brownlie, L. C. (2013). Motor thalamus integration of  
622 cortical, cerebellar and basal ganglia information: Implications for normal and parkinsonian  
623 conditions. In *Frontiers in Computational Neuroscience* (Issue NOV).  
624 <https://doi.org/10.3389/fncom.2013.00163>
- 625 Bouchard, K. E., Mesgarani, N., Johnson, K., & Chang, E. F. (2013). Functional organization of  
626 human sensorimotor cortex for speech articulation. *Nature*, *495*(7441), 327–332.  
627 <https://doi.org/10.1038/nature11911>
- 628 Brainard, D. H. (1997). The Psychophysics Toolbox. *Spatial Vision*, *10*(4), 433–436.  
629 <http://www.ncbi.nlm.nih.gov/pubmed/9176952>
- 630 Chrabaszcz, A., Neumann, W. J., Stretcu, O., Lipski, W. J., Bush, A., Dastolfo-Hromack, C. A.,  
631 Wang, D., Crammond, D. J., Shaiman, S., Dickey, M. W., Holt, L. L., Turner, R. S., Fiez, J.  
632 A., & Richardson, R. M. (2019). Subthalamic nucleus and sensorimotor cortex activity  
633 during speech production. *Journal of Neuroscience*, *39*(14), 2698–2708.  
634 <https://doi.org/10.1523/JNEUROSCI.2842-18.2019>
- 635 Coltheart, M., Rastle, K., Perry, C., Langdon, R., & Ziegler, J. (2001). DRC: A dual route  
636 cascaded model of visual word recognition and reading aloud. *Psychological Review*,  
637 *108*(1), 204–256. <https://doi.org/10.1037/0033-295X.108.1.204>
- 638 Crone, N. E., Sinai, A., & Korzeniewska, A. (2006). High-frequency gamma oscillations and  
639 human brain mapping with electrocorticography. *Progress in Brain Research*, *159*, 275–  
640 295. [https://doi.org/10.1016/S0079-6123\(06\)59019-3](https://doi.org/10.1016/S0079-6123(06)59019-3)
- 641 Crosson, B. (2013). Thalamic mechanisms in language: a reconsideration based on recent  
642 findings and concepts. *Brain and Language*, *126*(1), 73–88.  
643 <https://doi.org/10.1016/j.bandl.2012.06.011>
- 644 Dietz, N. A. E., Jones, K. M., Gareau, L., Zeffiro, T. A., & Eden, G. F. (2005). Phonological  
645 decoding involves left posterior fusiform gyrus. *Human Brain Mapping*, *26*(2), 81–93.  
646 <https://doi.org/10.1002/hbm.20122>

- 647 Engel, A. K., & Fries, P. (2010). Beta-band oscillations—signalling the status quo? *Current*  
648 *Opinion in Neurobiology*, 20(2), 156–165. <https://doi.org/10.1016/j.conb.2010.02.015>
- 649 Ewert, S., Plettig, P., Li, N., Chakravarty, M. M., Collins, D. L., Herrington, T. M., Kühn, A. A., &  
650 Horn, A. (2018). Toward defining deep brain stimulation targets in MNI space: A subcortical  
651 atlas based on multimodal MRI, histology and structural connectivity. *NeuroImage*, 170,  
652 271–282. <https://doi.org/10.1016/j.neuroimage.2017.05.015>
- 653 Fiez, J. A., Balota, D. A., Raichle, M. E., & Petersent, S. E. (1999). Effects of lexicality,  
654 frequency, and spelling-to-sound consistency on the functional anatomy of reading.  
655 *Neuron*, 24(1), 205–218. [https://doi.org/10.1016/S0896-6273\(00\)80833-8](https://doi.org/10.1016/S0896-6273(00)80833-8)
- 656 Fonov, V., Evans, A. C., Botteron, K., Almli, C. R., McKinstry, R. C., & Collins, D. L. (2011).  
657 Unbiased average age-appropriate atlases for pediatric studies. *NeuroImage*, 54(1), 313–  
658 327. <https://doi.org/10.1016/j.neuroimage.2010.07.033>
- 659 Hagoort, P., Indefrey, P., Brown, C., Herzog, H., Steinmetz, H., & Seitz, R. J. (1999). The neural  
660 circuitry involved in the reading of German words and pseudowords: A PET study. *Journal*  
661 *of Cognitive Neuroscience*, 11(4), 383–398. <https://doi.org/10.1162/089892999563490>
- 662 Hebb, A. O., & Ojemann, G. A. (2013). The thalamus and language revisited. *Brain and*  
663 *Language*, 126(1), 99–108. <https://doi.org/10.1016/j.bandl.2012.06.010>
- 664 Heim, S., Alter, K., Ischebeck, A. K., Amunts, K., Eickhoff, S. B., Mohlberg, H., Zilles, K., von  
665 Cramon, D. Y., & Friederici, A. D. (2005). The role of the left Brodmann's areas 44 and 45  
666 in reading words and pseudowords. *Brain Research. Cognitive Brain Research*, 25(3),  
667 982–993. <https://doi.org/10.1016/j.cogbrainres.2005.09.022>
- 668 Herbster, A. N., Mintun, M. A., Nebes, R. D., & Becker, J. T. (1997). Regional cerebral blood  
669 flow during word and nonword reading. *Human Brain Mapping*, 5(2), 84–92.  
670 [https://doi.org/10.1002/\(sici\)1097-0193\(1997\)5:2<84::aid-hbm2>3.0.co;2-i](https://doi.org/10.1002/(sici)1097-0193(1997)5:2<84::aid-hbm2>3.0.co;2-i)
- 671 Hickok, G. (2014). The architecture of speech production and the role of the phoneme in speech  
672 processing. *Language, Cognition and Neuroscience*, 29(1), 2–20.  
673 <https://doi.org/10.1080/01690965.2013.834370>
- 674 Hintzen, A., Pelzer, E. A., & Tittgemeyer, M. (2018). Thalamic interactions of cerebellum and  
675 basal ganglia. *Brain Structure & Function*, 223(2), 569–587.  
676 <https://doi.org/10.1007/s00429-017-1584-y>
- 677 Horn, A., & Kühn, A. A. (2015). Lead-DBS: A toolbox for deep brain stimulation electrode  
678 localizations and visualizations. *NeuroImage*, 107, 127–135.  
679 <https://doi.org/10.1016/j.neuroimage.2014.12.002>
- 680 Horn, A., Li, N., Dembek, T. A., Kappel, A., Boulay, C., Ewert, S., Tietze, A., Husch, A., Perera,

- 681 T., Neumann, W.-J., Reisert, M., Si, H., Oostenveld, R., Rorden, C., Yeh, F.-C., Fang, Q.,  
682 Herrington, T. M., Vorwerk, J., & Kühn, A. A. (2019). Lead-DBS v2: Towards a  
683 comprehensive pipeline for deep brain stimulation imaging. *NeuroImage*, *184*, 293–316.  
684 <https://doi.org/10.1016/j.neuroimage.2018.08.068>
- 685 Hwang, K., Bertolero, M. A., Liu, W. B., & D’Esposito, M. (2017). The Human Thalamus Is an  
686 Integrative Hub for Functional Brain Networks. *The Journal of Neuroscience*, *37*(23), 5594–  
687 5607. <https://doi.org/10.1523/JNEUROSCI.0067-17.2017>
- 688 Johnson, M. D., & Ojemann, G. A. (2000). The role of the human thalamus in language and  
689 memory: Evidence from electrophysiological studies. *Brain and Cognition*, *42*(2), 218–230.  
690 <https://doi.org/10.1006/brcg.1999.1101>
- 691 Juphard, A., Vidal, J. R., Perrone-Bertolotti, M., Minotti, L., Kahane, P., Lachaux, J.-P., & Baciú,  
692 M. (2011). Direct Evidence for Two Different Neural Mechanisms for Reading Familiar and  
693 Unfamiliar Words: An Intra-Cerebral EEG Study. *Frontiers in Human Neuroscience*, *5*, 101.  
694 <https://doi.org/10.3389/fnhum.2011.00101>
- 695 Klostermann, F., Nikulin, V. V., Kühn, A. A., Marzinzik, F., Wahl, M., Pogosyan, A., Kupsch, A.,  
696 Schneider, G.-H., Brown, P., & Curio, G. (2007). Task-related differential dynamics of EEG  
697 alpha- and beta-band synchronization in cortico-basal motor structures. *European Journal*  
698 *of Neuroscience*, *25*(5), 1604–1615. <https://doi.org/10.1111/j.1460-9568.2007.05417.x>
- 699 Kühn, A. A., Williams, D., Kupsch, A., Limousin, P., Hariz, M., Schneider, G.-H., Yarrow, K., &  
700 Brown, P. (2004). Event-related beta desynchronization in human subthalamic nucleus  
701 correlates with motor performance. *Brain*, *127*(4), 735–746.  
702 <https://doi.org/10.1093/brain/awh106>
- 703 Levelt, W. J. M., Roelofs, A., & Meyer, A. S. (1999). A theory of lexical access in speech  
704 production. In *Behavioral and Brain Sciences* (Vol. 22, Issue 1, pp. 1–75).  
705 <https://doi.org/10.1017/S0140525X99001776>
- 706 Lipski, W. J., Alhourani, A., Pirnia, T., Jones, P. W., Dastolfo-Hromack, C., Helou, L. B.,  
707 Crammond, D. J., Shaiman, S., Dickey, M. W., Holt, L. L., Turner, R. S., Fiez, J. A., &  
708 Richardson, R. M. (2018). Subthalamic nucleus neurons differentially encode early and late  
709 aspects of speech production. *Journal of Neuroscience*, *38*(24), 5620–5631.  
710 <https://doi.org/10.1523/JNEUROSCI.3480-17.2018>
- 711 Llano, D. A. (2015). The Thalamus and Language. In G. Hickok & S. L. Small (Eds.).  
712 *Neurobiology of Language* (pp. 95-114). Cambridge, MA: Academic Press.
- 713 Macchi, G., & Jones, E. G. (1997). Toward an agreement on terminology of nuclear and  
714 subnuclear divisions of the motor thalamus. *Journal of Neurosurgery*, *86*(1), 77–92.

- 715 <https://doi.org/10.3171/jns.1997.86.1.0077>
- 716 Mechelli, A., Gorno-Tempini, M. L., & Price, C. J. (2003). Neuroimaging studies of word and  
717 pseudoword reading: Consistencies, inconsistencies, and limitations. *Journal of Cognitive*  
718 *Neuroscience*, 15(2), 260–271. <https://doi.org/10.1162/089892903321208196>
- 719 Moore, M. W., Fiez, J. A., & Tompkins, C. A. (2017). Consonant Age-of-Acquisition Effects in  
720 Nonword Repetition Are Not Articulatory in Nature. *Journal of Speech, Language, and*  
721 *Hearing Research*, 60(11), 3198–3212. [https://doi.org/10.1044/2017\\_JSLHR-L-16-0359](https://doi.org/10.1044/2017_JSLHR-L-16-0359)
- 722 Oostenveld, R., Fries, P., Maris, E., & Schoffelen, J.-M. (2011). FieldTrip: Open Source  
723 Software for Advanced Analysis of MEG, EEG, and Invasive Electrophysiological Data.  
724 *Computational Intelligence and Neuroscience*, 2011, 1–9.  
725 <https://doi.org/10.1155/2011/156869>
- 726 Paradiso, G. (2004). Involvement of human thalamus in the preparation of self-paced  
727 movement. *Brain*, 127(12), 2717–2731. <https://doi.org/10.1093/brain/awh288>
- 728 Ray, S., Crone, N. E., Niebur, E., Franaszczuk, P. J., & Hsiao, S. S. (2008). Neural correlates of  
729 high-gamma oscillations (60–200 Hz) in macaque local field potentials and their potential  
730 implications in electrocorticography. *The Journal of Neuroscience : The Official Journal of*  
731 *the Society for Neuroscience*, 28(45), 11526–11536.  
732 <https://doi.org/10.1523/JNEUROSCI.2848-08.2008>
- 733 Ray, S., & Maunsell, J. H. R. (2011). Different Origins of Gamma Rhythm and High-Gamma  
734 Activity in Macaque Visual Cortex. *PLoS Biology*, 9(4), e1000610.  
735 <https://doi.org/10.1371/journal.pbio.1000610>
- 736 Tiedt, H. O., Ehlen, F., Krugel, L. K., Horn, A., Kühn, A. A., & Klostermann, F. (2017).  
737 Subcortical roles in lexical task processing: Inferences from thalamic and subthalamic  
738 event-related potentials. *Human Brain Mapping*, 38(1), 370–383.  
739 <https://doi.org/10.1002/hbm.23366>
- 740 Tzagarakis, C., Ince, N. F., Leuthold, A. C., & Pellizzer, G. (2010). Beta-band activity during  
741 motor planning reflects response uncertainty. *The Journal of Neuroscience : The Official*  
742 *Journal of the Society for Neuroscience*, 30(34), 11270–11277.  
743 <https://doi.org/10.1523/JNEUROSCI.6026-09.2010>
- 744 Uhlhaas, P. J., Pipa, G., Neuenschwander, S., Wibral, M., & Singer, W. (2011). A new look at  
745 gamma? High- (>60 Hz)  $\gamma$ -band activity in cortical networks: function, mechanisms and  
746 impairment. *Progress in Biophysics and Molecular Biology*, 105(1–2), 14–28.  
747 <https://doi.org/10.1016/j.pbiomolbio.2010.10.004>
- 748 Wahl, M., Marzinzik, F., Friederici, A. D., Hahne, A., Kupsch, A., Schneider, G. H., Saddy, D.,

- 749 Curio, G., & Klostermann, F. (2008). The Human Thalamus Processes Syntactic and  
750 Semantic Language Violations. *Neuron*, 59(5), 695–707.  
751 <https://doi.org/10.1016/j.neuron.2008.07.011>
- 752 Xu, B. (2001). Conjoint and Extended Neural Networks for the Computation of Speech Codes:  
753 The Neural Basis of Selective Impairment in Reading Words and Pseudowords. *Cerebral*  
754 *Cortex*, 11(3), 267–277. <https://doi.org/10.1093/cercor/11.3.267>
- 755 Zhang, D., Snyder, A. Z., Shimony, J. S., Fox, M. D., & Raichle, M. E. (2010). Noninvasive  
756 Functional and Structural Connectivity Mapping of the Human Thalamocortical System.  
757 *Cerebral Cortex*, 20(5), 1187–1194. <https://doi.org/10.1093/cercor/bhp182>  
758

759 **Thalamic encoding of lexical status is lateralized during reading aloud**

760

761

762

Wang et al., 2020

763

764

765

**Supplementary Information**

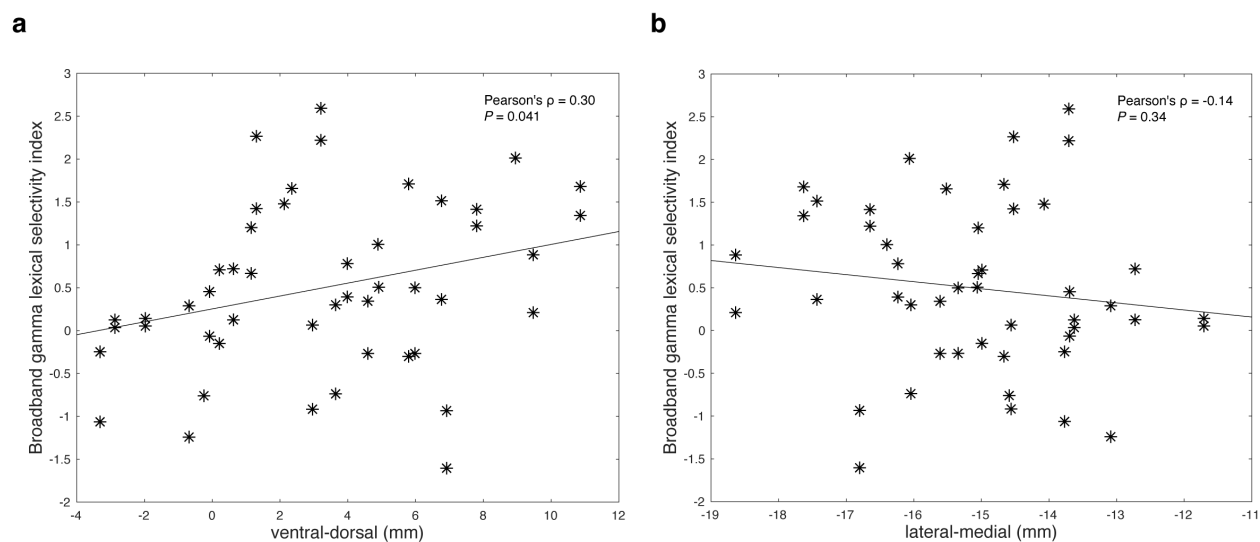

766

767 **Supplementary Figure 1: Correlation between left thalamic broadband gamma lexical**  
768 **selectivity and recording locations along ventral-dorsal and lateral-medial axes.**

769 Broadband gamma lexical selectivity indexes of left side lead recordings that showed significant  
770 task-related broadband gamma increase responses are correlated (Pearson's correlation,  
771  $\alpha=0.05$ ) with ventral-dorsal locations (**a**) and lateral-medial locations (**b**) of the recordings,  
772 respectively.

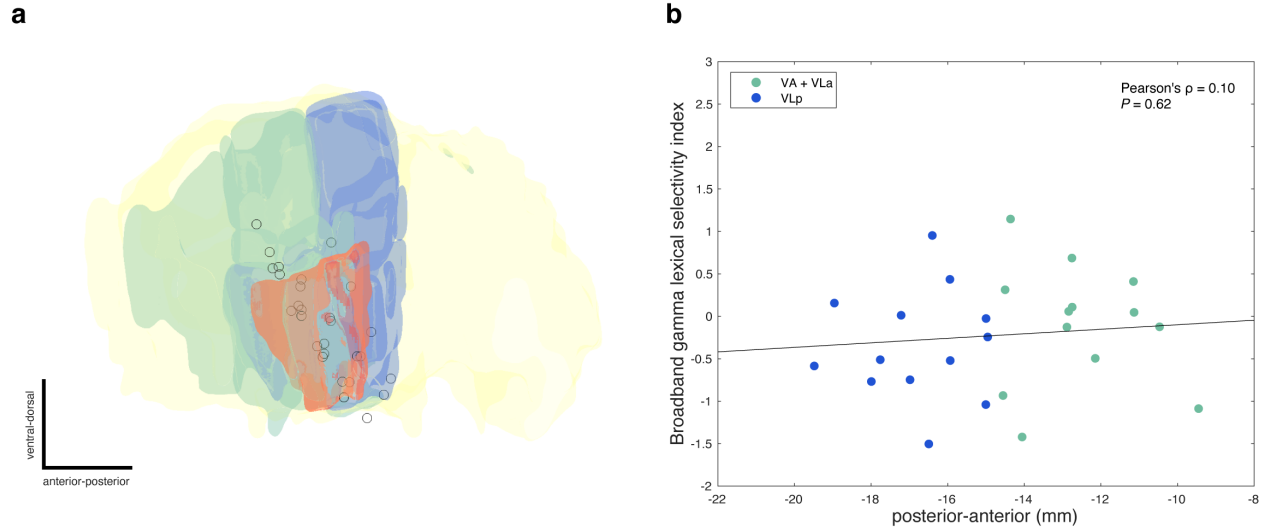

773

774 **Supplementary Figure 2: Broadband gamma lexical selectivity does not depend on**  
775 **anterior-posterior location of the recording in the right thalamus. a** Right side lead  
776 recording sites are flipped to the left and plotted together with anatomical structures (thalamus  
777 in yellow, VA and VLa in green, VLp in blue, and Vim in orange), viewed from a lateral direction.  
778 Recording sites where significantly nonword-selective recordings in terms of broadband gamma  
779 response amplitudes (broadband gamma lexical selectivity index > 1.645 based on normal  
780 approximation of t-distribution) were observed are filled with black (n=0), and remaining  
781 recording sites are shown in open circles. **b** Broadband gamma lexical selectivity indexes of  
782 right side lead recordings that showed significant task-related broadband gamma increase  
783 responses are correlated (Pearson's correlation,  $\alpha=0.05$ ) with recording locations along the  
784 anterior-posterior axis. Recordings inside VA or VLa are green-colored and recordings inside  
785 VLp are blue-colored.

786



787

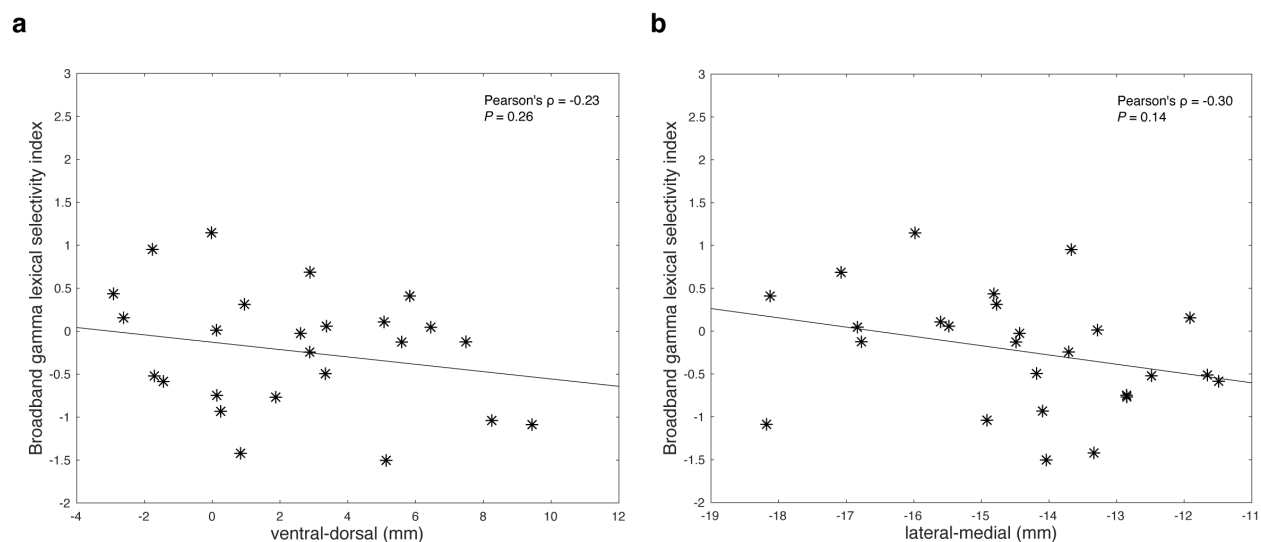

788

789 **Supplementary Figure 3: Correlation between right thalamic broadband gamma lexical**  
790 **selectivity and recording locations along ventral-dorsal and lateral-medial axes.**

791 Broadband gamma lexical selectivity indexes of right side lead recordings that showed  
792 significant task-related broadband gamma increase responses are correlated (Pearson's  
793 correlation,  $\alpha=0.05$ ) with ventral-dorsal locations (**a**) and lateral-medial locations (**b**) of the  
794 recordings, respectively.

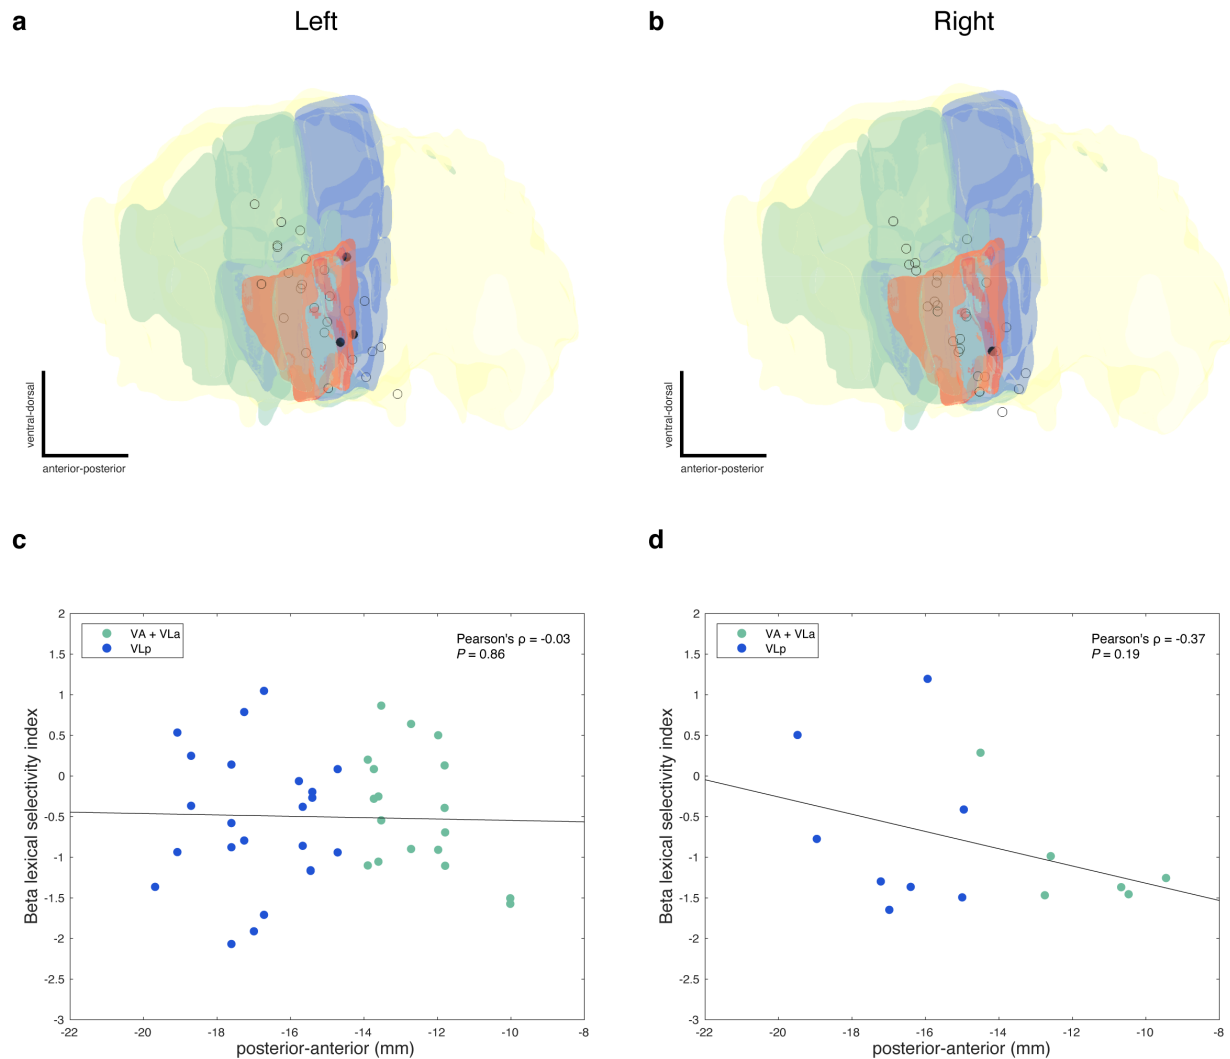

795

796 **Supplementary Figure 4: Beta lexical selectivity does not depend on anterior-posterior**  
797 **location of the recording in either side. a** Left side lead recording sites are plotted together  
798 with anatomical structures (thalamus in yellow, VA and VLa in green, VLp in blue, and Vim in  
799 orange), viewed from a lateral direction. Recording sites where significantly nonword-selective  
800 recordings in terms of beta response amplitudes (beta lexical selectivity index < -1.645 based on  
801 normal approximation of t-distribution) were observed in either session are filled with black, and  
802 remaining recording sites are shown in open circles. **b** Right side lead recording sites are flipped  
803 to the left and plotted in the same way. **c** Beta lexical selectivity indexes of left side lead  
804 recordings that showed significant task-related beta decrease responses are correlated  
805 (Pearson's correlation,  $\alpha=0.05$ ) with recording locations along the anterior-posterior axis. **d** Beta  
806 lexical selectivity indexes of right side lead recordings that showed significant task-related beta  
807 decrease responses are correlated (Pearson's correlation,  $\alpha=0.05$ ) with recording locations  
808 along the anterior-posterior axis. In **c** and **d**, recordings inside VA or VLa are green-colored and  
809 recordings inside VLp are blue-colored.

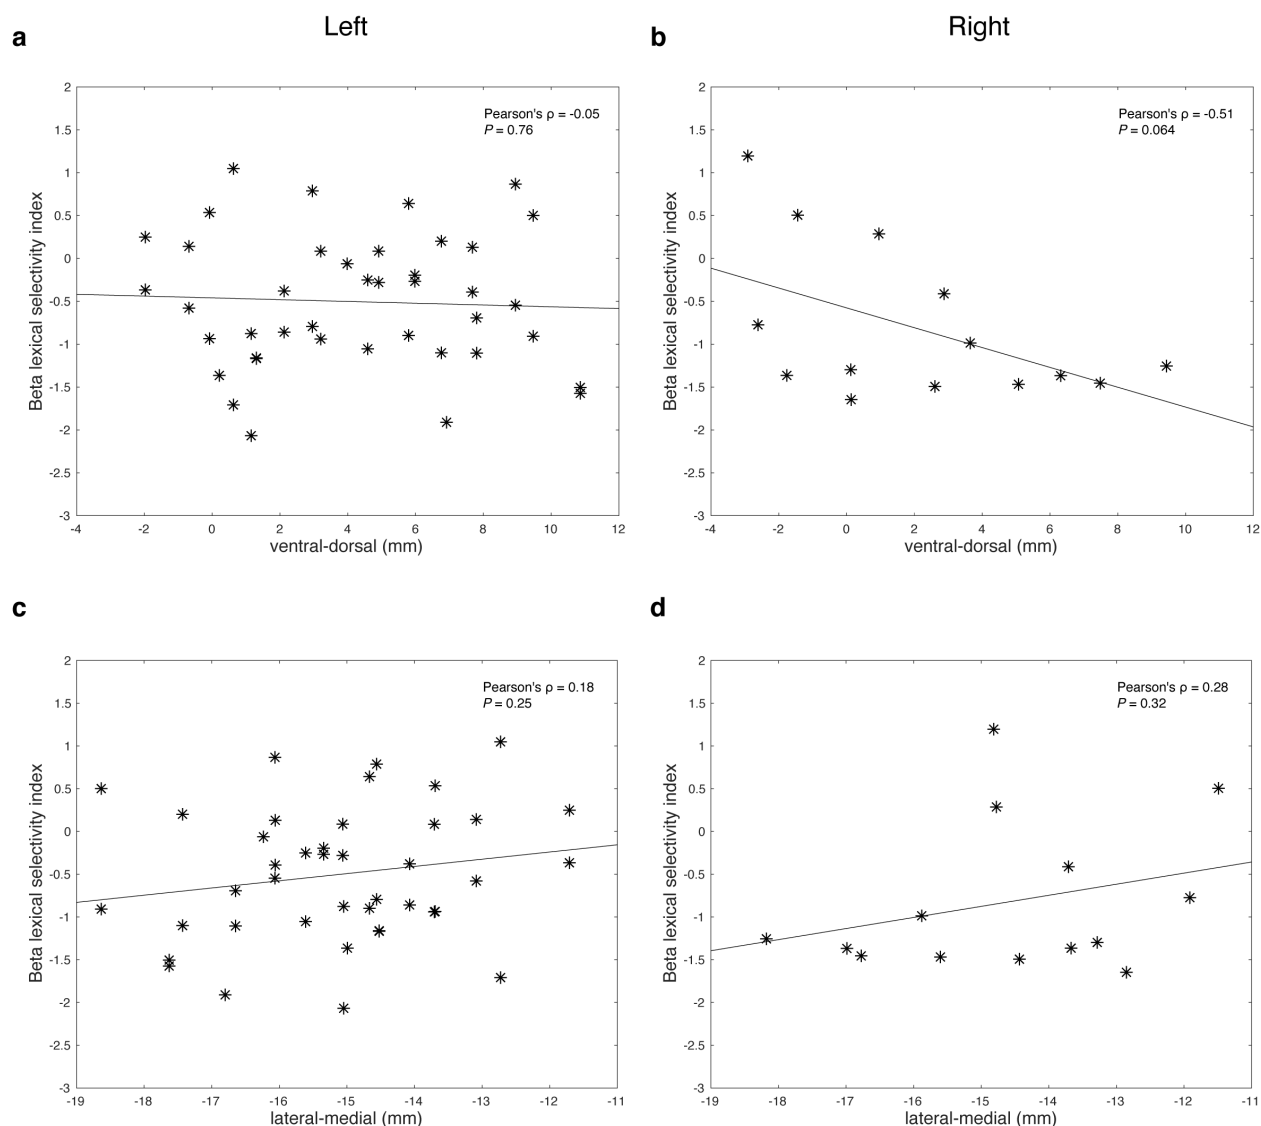

810

811 **Supplementary Figure 5: Correlation between thalamic beta lexical selectivity and**  
812 **recording locations along ventral-dorsal and lateral-medial axes. a, c** Beta lexical  
813 selectivity indexes of left side lead recordings that showed significant task-related beta decrease  
814 responses are correlated (Pearson's correlation,  $\alpha=0.05$ ) with ventral-dorsal locations (a) and  
815 lateral-medial locations (c) of the recordings, respectively. **b, d** Beta lexical selectivity indexes of  
816 right side lead recordings that showed significant task-related beta decrease responses are  
817 correlated (Pearson's correlation,  $\alpha=0.05$ ) with ventral-dorsal locations (b) and lateral-medial  
818 locations (d) of the recordings, respectively.

819 **Supplementary Table 1: Broadband gamma increase response and beta decrease**  
 820 **response differ in locking properties.**

| Response type                     | Number of recordings | Stimulus-locked (%) | Speech-locked (%) | Not locked (%) |
|-----------------------------------|----------------------|---------------------|-------------------|----------------|
| Broadband gamma increase response | 91                   | 19 (21)             | 70 (77)           | 2 (2)          |
| Beta decrease response            | 66                   | 43 (65)             | 19 (29)           | 4 (6)          |
| $\chi^2$                          | -                    | 31.4                | 36.1              | 1.55           |
| <i>P</i>                          | -                    | $< 10^{-5}$         | $< 10^{-5}$       | 0.21           |

821  
 822 **Supplementary Table 2: Locking properties of broadband gamma increase response and**  
 823 **beta decrease response do not differ between recording sides.**

| Response type                     | Number of recordings | Stimulus-locked (%) | Speech-locked (%) | Not locked (%) |
|-----------------------------------|----------------------|---------------------|-------------------|----------------|
| Broadband gamma increase response |                      |                     |                   |                |
| Left                              | 59                   | 10 (17)             | 47 (80)           | 2 (3)          |
| Right                             | 32                   | 9 (28)              | 23 (72)           | 0 (0)          |
| $\chi^2$                          | 2.49                 |                     |                   |                |
| <i>P</i>                          | 0.29                 |                     |                   |                |
| Beta decrease response            |                      |                     |                   |                |
| Left                              | 49                   | 31 (63)             | 14 (29)           | 4 (8)          |
| Right                             | 17                   | 12 (71)             | 5 (29)            | 0 (0)          |
| $\chi^2$                          | 1.50                 |                     |                   |                |
| <i>P</i>                          | 0.47                 |                     |                   |                |

824

825 **Supplementary Table 3: Stimulus lists.**

| Stimulus list 1 |         | Stimulus list 2 |         | Stimulus list 3 |         | Stimulus list 4 |         |
|-----------------|---------|-----------------|---------|-----------------|---------|-----------------|---------|
| First 60        | Last 60 | First 60        | Last 60 | First 60        | Last 60 | First 60        | Last 60 |
| daif            | daif    | dight           | dight   | deave           | deave   | dipe            | dipe    |
| van             | dutt    | void            | dute    | vowed           | doif    | vote            | doan    |
| dutt            | foat    | dute            | fape    | doif            | feam    | doan            | fode    |
| vied            | fute    | vet             | foon    | vat             | feeve   | vain            | fett    |
| foat            | meef    | fape            | mide    | feam            | vune    | fode            | meave   |
| town            | mipe    | type            | tep     | tied            | mafe    | towed           | mep     |
| fute            | neave   | foon            | veem    | feeve           | mupe    | fett            | neam    |
| teed            | nime    | tune            | naid    | team            | nipe    | time            | noit    |
| meef            | paim    | mide            | noop    | vune            | noove   | meave           | peff    |
| putt            | pote    | pain            | pime    | poof            | pode    | pine            | poom    |
| mipe            | teeve   | tep             | peaf    | mafe            | poun    | mep             | taid    |
| pout            | toff    | peeve           | taff    | pave            | teep    | phone           | tife    |
| neave           | vapp    | veem            | toove   | mupe            | tem     | neam            | vadd    |
| note            | vife    | node            | vade    | need            | vight   | paid            | vate    |
| nime            | vean    | naid            | vome    | nipe            | ved     | noit            | veet    |
| moon            | laz     | mood            | zool    | moat            | soith   | neat            | leeth   |
| paim            | saith   | noop            | loath   | noove           | luth    | peff            | sish    |
| mauve           | lesh    | mean            | luss    | main            | losh    | mode            | luthe   |
| pote            | rel     | pime            | rall    | pode            | rith    | poom            | ral     |
| knife           | reez    | knot            | suzz    | knight          | ruzz    | might           | riz     |
| teeve           | shuss   | peaf            | saze    | poun            | sar     | taid            | soush   |
| fought          | shule   | fight           | seash   | foot            | shoss   | knit            | shar    |
| toff            | sosh    | taff            | shez    | teep            | shiz    | tife            | shoth   |
| five            | sithe   | feed            | shile   | foam            | sile    | food            | thaze   |
| vapp            | thace   | toove           | thar    | tem             | thale   | vadd            | theal   |
| fade            | thauz   | fame            | thil    | fain            | thall   | fate            | sule    |
| vife            | thole   | vade            | thure   | vight           | thice   | vate            | sazz    |
| deep            | thoss   | dine            | thush   | doubt           | thel    | dive            | thosh   |
| vean            | zal     | vome            | zel     | ved             | zoice   | veet            | zoil    |
| dawn            | zole    | date            | soth    | dime            | zus     | dean            | zil     |
| laz             | daif    | zool            | dight   | soith           | deave   | leeth           | dipe    |

---

|         |       |       |       |       |       |       |       |
|---------|-------|-------|-------|-------|-------|-------|-------|
| zoom    | dutt  | zone  | dute  | zip   | doif  | zap   | doan  |
| saith   | foat  | loath | fape  | luth  | feam  | sish  | fode  |
| thought | fute  | thud  | foon  | thumb | feeve | thief | fett  |
| lesh    | meef  | luss  | mide  | losh  | vune  | luthe | meave |
| thin    | mipe  | theme | tep   | that  | mafe  | them  | mep   |
| rel     | neave | rall  | veem  | rith  | mupe  | ral   | neam  |
| this    | nime  | wrath | naid  | zeal  | nipe  | thus  | noit  |
| reez    | paim  | suzz  | noop  | ruzz  | noove | riz   | peff  |
| shoes   | pote  | these | pime  | those | pode  | thaws | poom  |
| shuss   | teeve | saze  | peaf  | sar   | poun  | soush | taid  |
| shawl   | toff  | sure  | taff  | south | teep  | shies | tife  |
| shule   | vapp  | seash | toove | shoss | tem   | shar  | vadd  |
| sell    | vife  | soar  | vade  | sill  | vight | sews  | vate  |
| sosh    | vean  | shez  | vome  | shiz  | ved   | shoth | veet  |
| sear    | laz   | size  | zool  | shore | soith | sale  | leeth |
| sithe   | saith | shile | loath | sile  | luth  | thaze | sish  |
| sash    | lesh  | shell | luss  | shale | losh  | share | luthe |
| thace   | rel   | thar  | rall  | thale | rith  | theal | ral   |
| rush    | reez  | seal  | suzz  | role  | ruzz  | lace  | riz   |
| thauz   | shuss | thil  | saze  | thall | sar   | sule  | soush |
| rise    | shule | rose  | seash | rash  | shoss | lash  | shar  |
| thole   | sosh  | thure | shez  | thice | shiz  | sazz  | shoth |
| race    | sithe | rail  | shile | raise | sile  | lore  | thaze |
| thoss   | thace | thush | thar  | thel  | thale | thosh | theal |
| loathe  | thauz | loss  | thil  | lure  | thall | lose  | sule  |
| zal     | thole | zel   | thure | zoice | thice | zoil  | sazz  |
| laze    | thoss | lies  | thush | lows  | thel  | rule  | thosh |
| zole    | zal   | soth  | zel   | zus   | zoice | zil   | zoil  |
| laws    | zole  | leash | soth  | lice  | zus   | rice  | zil   |

---

826

827

828 **Supplementary Table 4: *P* values of statistical tests comparing psycholinguistic**  
829 **parameters between word and nonword stimuli.**

|                                            | Stimulus list 1 | Stimulus list 2 | Stimulus list 3 | Stimulus list 4 |
|--------------------------------------------|-----------------|-----------------|-----------------|-----------------|
| Weighted phonological neighborhood density | 0.23            | 0.43            | 0.88            | 0.86            |
| Summed bigram frequency                    | 0.97            | 0.51            | 0.39            | 0.32            |
| Summed phoneme probability                 | 0.47            | 0.33            | 0.37            | 0.51            |
| Summed biphone probability                 | 0.65            | 0.65            | 0.65            | 0.90            |

830 Two-tailed two-sample t-test, n=60,  $\alpha=0.05$ .
